# Supplementary material for: The Pediatric Precision Oncology INFORM Registry: Clinical Outcome and Benefit for Patients with Very High-Evidence Targets
Source: Oxford University Press journal article supplement (doi:10.1158/2159-8290.cd-21-0094), 2021-08-09
Supplement: cd-21-0094_table_s1_suppst1.xlsx [file cd-21-0094_table_s1_suppst1.xlsx]

## Sheet: Table S1
	Table S1. Patient sample sequencing completion.
		Total patients samples sequenced	Molecular analysis unsuccessful	Samples successfully analyzed	WES	lcWGS	RNAseq	DNA methylation
	Total	955	29	926	926 (100%)	925 (99,9%)	781 (84.3%)	923 (99.7%)
	Total international	347 (36.3%)	12 (41.4%)	335 (36.2%)	335 (100%)	335 (100%)	283 (84.5 %)	333 (99.4%)
	Analysis population	.	.	519	519 (100%)	518 (99.8%)	433 (83.4%)	519 (100%)
	Analysis population international	.	.	123 (23.7%)	123 (100%)	123 (100%)	97 (78.9%)	123 (100%)
	Abbreviations: whole exome sequencing, WES; low-coverage whole genome sequencing, lcWGS; RNA sequencing, RNAseq
