# Supplementary material for: The Pediatric Precision Oncology INFORM Registry: Clinical Outcome and Benefit for Patients with Very High-Evidence Targets
Source: Oxford University Press journal article supplement (doi:10.1158/2159-8290.cd-21-0094), 2021-08-09
Supplement: cd-21-0094_table_s3_suppst3.xlsx [file cd-21-0094_table_s3_suppst3.xlsx]

## Sheet: Table S3
Patient identifier	Actionable targets identified	Alteration type	Specification Other alteration	Gene	Coding sequence change	Amino acid change	Tumor variant allele fraction	Fusion 5' gene	Fusion 3' gene	Number of somatic SNVs/exome	Priority level
INF_P_19	Yes	Deletion		CDKN2A/B							Moderate
INF_P_19	Yes	Single nucleotide variant		PIK3CA	c.G1633A	p.E545K	0.26				Moderate
INF_P_19	Yes	Overexpression		VEGFB							Intermediate
INF_P_19	Yes	Overexpression		MAP2K2							Intermediate
INF_P_19	Yes	Overexpression		AKT2							Intermediate
INF_P_22	Yes	Amplification		MYCN							Intermediate
INF_P_40	No
INF_R_001	Yes	Amplification		MDM2							High
INF_R_001	Yes	Deletion		NF1							Moderate
INF_R_001	Yes	Overexpression		EPHA3							Very low
INF_R_002	Yes	Amplification		BRAF							Intermediate
INF_R_002	Yes	Single nucleotide variant		MTOR	c.T5918C	p.I1973T	0.37				Intermediate
INF_R_002	Yes	Overexpression		AKT3							Low
INF_R_002	Yes	Single nucleotide variant		PLK1	c.T719G	p.I240S	0.48				Very low
INF_R_002	Yes	Single nucleotide variant		ERBB2	c.G1150A	p.D384N	0.11				Very low
INF_R_003	Yes	Overexpression		RET							Low
INF_R_003	Yes	Overexpression		PDGFRA							Low
INF_R_003	Yes	Single nucleotide variant		STAT3	c.G547A	p.G183R	0.24				Very low
INF_R_003	Yes	Single nucleotide variant		AURKB	c.G188A	p.G63E	0.26				Very low
INF_R_004	Yes	Overexpression		AR							Very low
INF_R_004	Yes	Overexpression		MST1							Very low
INF_R_004	Yes	Overexpression		INSR							Very low
INF_R_004	Yes	Single nucleotide variant		RAF1	c.T727C	p.S243P	0.19				Very low
INF_R_005	Yes	Amplification		PDGFRA							High
INF_R_006	Yes	Amplification		FGFR1							High
INF_R_007	Yes	Fusion						KIT	PDGFRA		High
INF_R_007	Yes	Amplification		KDR							Intermediate
INF_R_007	Yes	Amplification		KIT							Intermediate
INF_R_007	Yes	Single nucleotide variant		CDKN2D	c.C400T	p.R134C	0.11				Very low
INF_R_008	Yes	Amplification		MDM2							High
INF_R_008	Yes	Amplification		CDK4							High
INF_R_008	Yes	Amplification		GLI1							Intermediate
INF_R_008	Yes	Single nucleotide variant		MRAS	c.G64T	p.G22W	0.64				Intermediate
INF_R_009	Yes	Single nucleotide variant		KRAS	c.G35T	p.G12V	0.36				Moderate
INF_R_009	Yes	Fusion						MLL	MLLT10		Moderate
INF_R_009	Yes	Overexpression		BTK							Low
INF_R_010	Yes	Fusion						INPP5D	ABL1		High
INF_R_010	Yes	Overexpression		CCND2/3							Low
INF_R_010	Yes	Single nucleotide variant		FGFR2	c.G1534A	p.V512M	0.31				Very low
INF_R_010	Yes	Single nucleotide variant		RASGRP3	c.G863A	p.R288H	0.39				Very low
INF_R_011	Yes	Fusion						EWSR1	FLI1		Moderate
INF_R_011	Yes	Single nucleotide variant		DAPK1	c.G377T	p.G126V	0.09				Very low
INF_R_011	Yes	Single nucleotide variant		ALK	c.G2068T	p.A690S	0.4				Very low
INF_R_012	Yes	Deletion		CDKN2A/B							Moderate
INF_R_012	Yes	InDel		PTCH1	c.2725delG	p.D909fs	0.76				Intermediate
INF_R_012	Yes	Overexpression		PDGFRA							Borderline
INF_R_012	Yes	Overexpression		EGFR							Borderline
INF_R_012	Yes	Single nucleotide variant		ESRRA	c.G964T	p.E322X	0.47				Very low
INF_R_013	Yes	Amplification		PDGFRA							High
INF_R_013	Yes	Fusion						GKAP1	NTRK2		High
INF_R_013	Yes	Deletion		CDKN2A/B							Moderate
INF_R_013	Yes	Amplification		MYCN							Moderate
INF_R_014	Yes	Amplification		CDK4							High
INF_R_014	Yes	Overexpression		ALK							Intermediate
INF_R_014	Yes	Overexpression		FGFR4							Intermediate
INF_R_014	Yes	Overexpression		NTRK3							Borderline
INF_R_014	Yes	Overexpression		ERBB3							Borderline
INF_R_015	Yes	Single nucleotide variant		NRAS	c.G34A	p.G12S	0.37				Moderate
INF_R_015	Yes	Overexpression		FLT3							Borderline
INF_R_015	Yes	Overexpression		MCL1							Borderline
INF_R_015	Yes	Overexpression		PIK3CA							Very low
INF_R_018	Yes	Overexpression		MET							Borderline
INF_R_018	Yes	Overexpression		FGFR4							Borderline
INF_R_018	Yes	Overexpression		CD274							Very low
INF_R_018	Yes	Fusion						PAX3	FOXO1		Very low
INF_R_020	Yes	Single nucleotide variant		CDKN2A	c.C101T	p.A34V	0.09				Low
INF_R_020	Yes	Overexpression		PIK3CB							Very low
INF_R_021	Yes	Single nucleotide variant		ERBB2	c.G2524A	p.V842I	0.12				Very high
INF_R_021	Yes	Single nucleotide variant		ERBB2	c.G2329T	p.V777L	0.11				Very high
INF_R_021	Yes	Single nucleotide variant		KRAS	c.G175A	p.A59T	0.12				High
INF_R_021	Yes	Single nucleotide variant		HRAS	c.C53T	p.A18V	0.16				Moderate
INF_R_021	Yes	Single nucleotide variant		ERBB3	c.C3701A	p.S1234Y	0.15				Borderline
INF_R_021	Yes	Single nucleotide variant		TSC2	c.G3022A	p.V1008M	0.09				Low
INF_R_021	Yes	Other	high SNV count							n = 775	NA
INF_R_022	Yes	Deletion		SMARCB1							Intermediate
INF_R_022	Yes	Single nucleotide variant		FGFR1	c.A2174G	p.N725S	0.44				Borderline
INF_R_022	Yes	Amplification		GLI3							Low
INF_R_022	Yes	Overexpression		LYN							Very low
INF_R_023	Yes	Amplification		MYCN							Intermediate
INF_R_023	Yes	Overexpression		RAF1							Low
INF_R_023	Yes	Overexpression		DNMT1							Very low
INF_R_024	Yes	Fusion						EWSR1	FLI1		Intermediate
INF_R_024	Yes	Overexpression		JAK2							Very low
INF_R_024	Yes	Overexpression		KRAS							Very low
INF_R_024	Yes	Overexpression		ABL1							Very low
INF_R_025	Yes	Deletion		CDKN2A/B							Moderate
INF_R_025	Yes	Overexpression		MAP2K1							Intermediate
INF_R_025	Yes	Overexpression		NOTCH1							Very low
INF_R_026	Yes	Amplification		CDK6							High
INF_R_026	Yes	Single nucleotide variant		PTEN	c.G29A	p.S10N	0.86				Moderate
INF_R_026	Yes	InDel		PIK3R1	c.1140_1145del	p.381_382del	0.67				Low
INF_R_027	Yes	Overexpression		ERBB2							Borderline
INF_R_027	Yes	Overexpression		PIK3R1							Low
INF_R_028	Yes	Single nucleotide variant		AKT3	c.G49A	p.E17K	0.32				Very high
INF_R_028	Yes	Single nucleotide variant		BRAF	c.T1799A	p.V600E	0.27				Very high
INF_R_028	Yes	Deletion		CDKN2A/B							Moderate
INF_R_028	Yes	Overexpression		SRC							Intermediate
INF_R_028	Yes	Overexpression		ERBB3							Intermediate
INF_R_028	Yes	Overexpression		CD274							Very low
INF_R_029	Yes	Deletion		CDKN2A							Moderate
INF_R_029	Yes	Single nucleotide variant		NTRK3	c.C2389A	p.P797T	0.39				Intermediate
INF_R_029	Yes	Single nucleotide variant		ERBB2	c.G1087A	p.E363K	0.31				Low
INF_R_030	Yes	InDel		PDGFRB	c.1692_1706del	p.564_569del	0.20				Borderline
INF_R_030	Yes	Fusion						CHD2	TTC1		Very low
INF_R_030	Yes	Overexpression		ABL2							Very low
INF_R_030	Yes	Overexpression		PDGFA							Very low
INF_R_030	Yes	Overexpression		HDAC9							Very low
INF_R_031	No
INF_R_032	Yes	Amplification		MYC							Intermediate
INF_R_032	Yes	Overexpression		AURKA/B							Borderline
INF_R_032	Yes	Overexpression		FGFR3							Borderline
INF_R_032	Yes	Amplification		ABL2							Borderline
INF_R_033	Yes	Overexpression		FLT3							Intermediate
INF_R_033	Yes	Fusion						AFF1	MLL		Intermediate
INF_R_033	Yes	Overexpression		PIK3R1							Low
INF_R_033	Yes	Overexpression		NRAS							Low
INF_R_034	Yes	Single nucleotide variant		EZH2	c.C2075T	p.A692V	0.44				Moderate
INF_R_034	Yes	Single nucleotide variant		AURKA	c.T251C	p.V84A	0.16				Borderline
INF_R_037	Yes	Single nucleotide variant		SRC	c.T700C	p.S234P	0.14				Borderline
INF_R_037	Yes	Fusion						VIM	MLL		Borderline
INF_R_037	Yes	Overexpression		KRAS							Low
INF_R_037	Yes	Overexpression		GLI3							Low
INF_R_037	Yes	Single nucleotide variant		IRS2	c.G3923T	p.G1308V	0.24				Low
INF_R_039	Yes	Single nucleotide variant		ALK	c.G3824A	p.R1275Q	0.77				Very high
INF_R_039	Yes	Overexpression		INSR							Borderline
INF_R_041	Yes	Overexpression		KIT							Intermediate
INF_R_041	Yes	Overexpression		BCL2							Borderline
INF_R_041	Yes	Overexpression		PRKCQ							Very low
INF_R_042	Yes	Fusion						KIRREL	NTRK1		Very high
INF_R_042	Yes	Amplification		MYC							Intermediate
INF_R_042	Yes	Amplification		MYCN							Intermediate
INF_R_043	Yes	InDel		PIK3R1	c.1980_1981insTGTAG	p.S660fs	0.17				Moderate
INF_R_044	Yes	Single nucleotide variant		AKT1	c.A968G	p.D323G	0.37				Intermediate
INF_R_045	Yes	Deletion		CDKN2A/B							Moderate
INF_R_045	Yes	Overexpression		ABL1							Intermediate
INF_R_045	Yes	Overexpression		MAP2K1							Intermediate
INF_R_046	Yes	Overexpression		PIK3CA							Borderline
INF_R_046	Yes	Overexpression		CCND1							Low
INF_R_047	No
INF_R_048	Yes	Single nucleotide variant		NRAS	c.G34T	p.G12C	0.46				High
INF_R_048	Yes	Deletion		CDKN2A/B							Moderate
INF_R_048	Yes	Overexpression		PIK3CA							Intermediate
INF_R_048	Yes	Overexpression		MDM2							Borderline
INF_R_050	Yes	Amplification		FGFR1							High
INF_R_050	Yes	Amplification		KDR							Intermediate
INF_R_050	Yes	Other	high SNV count							n = 114	NA
INF_R_051	Yes	Overexpression		NTRK3							Borderline
INF_R_051	Yes	Overexpression		FGFR2							Borderline
INF_R_052	Yes	Overexpression		HCK							Very low
INF_R_052	Yes	Overexpression		JAK2							Very low
INF_R_053	Yes	Amplification		FGFR4							Moderate
INF_R_053	Yes	Overexpression		ALK							Intermediate
INF_R_053	Yes	Overexpression		FGFR2							Intermediate
INF_R_053	Yes	Other	high SNV count							n = 140	NA
INF_R_054	Yes	Overexpression		CDK6							Intermediate
INF_R_054	Yes	Overexpression		ALK							Intermediate
INF_R_054	Yes	Overexpression		NRAS							Low
INF_R_054	Yes	Overexpression		PRKCA							Very low
INF_R_054	Yes	Overexpression		TERT							Very low
INF_R_056	Yes	Overexpression		IGF1R							Borderline
INF_R_056	Yes	Overexpression		RET							Borderline
INF_R_056	Yes	Overexpression		GLI2							Low
INF_R_057	Yes	Fusion						PPP1CB	ALK		High
INF_R_059	Yes	InDel		FLT3	c.2508_2510del	p.836_837del	0.38				Moderate
INF_R_059	Yes	Single nucleotide variant		MET	c.C788T	p.T263M	0.28				Borderline
INF_R_059	Yes	Single nucleotide variant		LYN	c.A538G	p.I180V	0.17				Borderline
INF_R_060	Yes	Amplification		MYC							Intermediate
INF_R_060	Yes	Overexpression		RAF1							Borderline
INF_R_061	Yes	Deletion		CDKN2A/B							Moderate
INF_R_061	Yes	Overexpression		BRD4							Borderline
INF_R_061	Yes	Overexpression		GLI2							Low
INF_R_062	Yes	Overexpression		ERBB2							Borderline
INF_R_062	Yes	Overexpression		VEGFA							Borderline
INF_R_062	Yes	Overexpression		FGFR2							Borderline
INF_R_062	Yes	Single nucleotide variant		ABL1	c.A1273G	p.T425A	0.05				Borderline
INF_R_062	Yes	Overexpression		GLI3							Low
INF_R_063	Yes	Single nucleotide variant		BRAF	c.T1799A	p.V600E	0.47				Very high
INF_R_063	Yes	Deletion		CDKN2A/B							Moderate
INF_R_063	Yes	Amplification		AKT3							Intermediate
INF_R_063	Yes	Overexpression		IGF1R							Borderline
INF_R_063	Yes	Overexpression		AXL							Borderline
INF_R_064	Yes	Overexpression		FGFR4							Intermediate
INF_R_064	Yes	Overexpression		ERBB3							Borderline
INF_R_064	Yes	Amplification		NOTCH1							Borderline
INF_R_064	Yes	Amplification		GLI2							Borderline
INF_R_065	Yes	Single nucleotide variant		BRAF	c.T1799A	p.V600E	0.38				Very high
INF_R_065	Yes	Deletion		CDKN2A/B							Moderate
INF_R_065	Yes	Single nucleotide variant		NF1	c.G4992A	p.W1664X	0.08				Moderate
INF_R_065	Yes	Single nucleotide variant		TSC2	c.G2688A	p.W896X	0.70				Intermediate
INF_R_065	Yes	Single nucleotide variant		BRAF	c.C1006T	p.P336S	0.07				Very low
INF_R_065	Yes	Other	high SNV count							n = 6109	NA
INF_R_066	Yes	Overexpression		KIT							Borderline
INF_R_066	Yes	Single nucleotide variant		NOTCH3	c.C343T	p.P115S	0.47				Borderline
INF_R_067	Yes	Deletion		NF1							Moderate
INF_R_067	Yes	Deletion		CDKN2A/B							Moderate
INF_R_067	Yes	Overexpression		MET							Borderline
INF_R_067	Yes	Overexpression		AXL							Borderline
INF_R_067	Yes	Overexpression		TNFRSF10A							Very low
INF_R_069	Yes	Deletion		CDKN2A/B							Moderate
INF_R_069	Yes	Deletion		PTEN							Moderate
INF_R_069	Yes	Overexpression		SRC							Intermediate
INF_R_069	Yes	Overexpression		MAP2K1							Borderline
INF_R_070	Yes	Overexpression		KDR							Intermediate
INF_R_070	Yes	Overexpression		ERBB2							Borderline
INF_R_070	Yes	Overexpression		AKT1							Borderline
INF_R_070	Yes	Overexpression		HRAS							Low
INF_R_071	Yes	Deletion		CDKN2A							Moderate
INF_R_071	Yes	Single nucleotide variant		KRAS	c.G35A	p.G12D	0.67				Moderate
INF_R_071	Yes	Overexpression		JAK3							Borderline
INF_R_071	Yes	Overexpression		MDM2							Borderline
INF_R_072	Yes	Overexpression		FGFR3							Borderline
INF_R_072	Yes	Single nucleotide variant		CDK4	c.T565A	p.S189T	0.43				Borderline
INF_R_072	Yes	Single nucleotide variant		PDGFRA	c.C1034T	p.P345L	0.45				Borderline
INF_R_073	Yes	Overexpression		NTRK2							Borderline
INF_R_075	Yes	Overexpression		MAP2K1							Borderline
INF_R_075	Yes	Amplification		MDM2							Borderline
INF_R_075	Yes	Overexpression		PIK3CB							Very low
INF_R_076	Yes	Fusion						MLL	MLLT4		Intermediate
INF_R_077	Yes	Single nucleotide variant		PIK3CA	c.A3140G	p.H1047R	0.34				High
INF_R_077	Yes	Overexpression		MET							Borderline
INF_R_079	Yes	Single nucleotide variant		NF1	c.C6670T	p.Q2224X	0.47				High
INF_R_079	Yes	Single nucleotide variant		PTEN	c.G976C	p.D326H	0.22				Low
INF_R_080	Yes	Deletion		NF1							High
INF_R_080	Yes	Amplification		MYCN							Intermediate
INF_R_080	Yes	Overexpression		RET							Borderline
INF_R_080	Yes	Overexpression		HGF							Low
INF_R_081	Yes	Overexpression		RET							Borderline
INF_R_081	Yes	Overexpression		MAP2K2							Borderline
INF_R_081	Yes	Overexpression		AURKA							Borderline
INF_R_081	Yes	Overexpression		HGF							Low
INF_R_082	Yes	Amplification		CDK4							High
INF_R_082	Yes	Single nucleotide variant		SOS2	c.A2620T	p.S874C	0.26				Low
INF_R_082	Yes	Single nucleotide variant		CCND1	c.T878A	p.V293E	0.20				Low
INF_R_082	Yes	Overexpression		AURKC							Very low
INF_R_082	Yes	Overexpression		PRKCA							Very low
INF_R_082	Yes	Other	high SNV count							n = 153	NA
INF_R_083	Yes	Overexpression		FLT1							Borderline
INF_R_083	Yes	Overexpression		CD274							Low
INF_R_084	Yes	Single nucleotide variant		NF1	c.7322-2A>T	NA	0.83				High
INF_R_084	Yes	Amplification		TERT							Moderate
INF_R_084	Yes	Overexpression		SRC							Intermediate
INF_R_084	Yes	Single nucleotide variant		PRKCB	c.G729T	p.E243D	0.35				Intermediate
INF_R_085	Yes	Deletion		PTEN							Moderate
INF_R_085	Yes	Deletion		CDKN2A/B							Moderate
INF_R_085	Yes	Amplification		MYC							Intermediate
INF_R_085	Yes	Overexpression		PTK2							Borderline
INF_R_085	Yes	Overexpression		NTRK2							Borderline
INF_R_086	Yes	Amplification		FGFR1							Moderate
INF_R_086	Yes	Amplification		MDM2							Intermediate
INF_R_087	Yes	Deletion		CDKN2A							Moderate
INF_R_087	Yes	Single nucleotide variant		TGFB1	c.G196A	p.G66R	0.46				Very low
INF_R_088	Yes	Single nucleotide variant		JAK2	c.A3079G	p.T1027A	0.19				Borderline
INF_R_088	Yes	Single nucleotide variant		NTRK2	c.A1372G	p.R458G	0.11				Borderline
INF_R_088	Yes	Overexpression		CCND2							Low
INF_R_089	Yes	Overexpression		ERBB3							Intermediate
INF_R_090	Yes	Overexpression		ALK							Intermediate
INF_R_090	Yes	Overexpression		FGFR4							Intermediate
INF_R_090	Yes	InDel		NOTCH2	c.5245_5246del	p.1749_1749del+fs	0.47				Borderline
INF_R_090	Yes	Overexpression		HRAS							Low
INF_R_091	Yes	Overexpression		NTRK2							Intermediate
INF_R_092	Yes	Deletion		NF1							High
INF_R_092	Yes	Amplification		MYCN							Intermediate
INF_R_094	Yes	Single nucleotide variant		KRAS	c.G34C	p.G12R	0.33				High
INF_R_094	Yes	Deletion		CDKN2A							Moderate
INF_R_094	Yes	Single nucleotide variant		BRAF	c.G1411T	p.V471F	0.79				Moderate
INF_R_094	Yes	Single nucleotide variant		FYN	c.C1142T	p.T381M	0.38				Intermediate
INF_R_095	No
INF_R_097	Yes	Deletion		CDKN2A/B							Intermediate
INF_R_097	Yes	Overexpression		ERBB2							Borderline
INF_R_098	Yes	Overexpression		ALK							Intermediate
INF_R_098	Yes	Amplification		MYCN							Intermediate
INF_R_099	Yes	Deletion		CDKN2A/B							Moderate
INF_R_099	Yes	Overexpression		FGFR4							Intermediate
INF_R_099	Yes	Amplification		MYCN							Intermediate
INF_R_099	Yes	Overexpression		AURKB							Borderline
INF_R_1002	Yes	Deletion		SMARCB1							Intermediate
INF_R_1002	Yes	Overexpression		FGFR2							Borderline
INF_R_1002	Yes	Overexpression		ABL1							Borderline
INF_R_1002	Yes	Single nucleotide variant		ALK	c.C3091A	p.L1031M	0.06				Borderline
INF_R_1002	Yes	Single nucleotide variant		ROS1	c.C1742G	p.A581G	0.32				Borderline
INF_R_1002	Yes	Overexpression		HGF							Low
INF_R_1003	Yes	Single nucleotide variant		SMARCA4	c.C4609T	p.Q1537X	0.22				Intermediate
INF_R_1003	Yes	Overexpression		NRG1							Low
INF_R_1007	Yes	Single nucleotide variant		PDGFRB	c.C1118T	p.S373L	0.28				Borderline
INF_R_1007	Yes	Other	'BRCAness' positive								NA
INF_R_101	Yes	Overexpression		EPHA2							Borderline
INF_R_101	Yes	Overexpression		FLT4							Borderline
INF_R_101	Yes	Overexpression		CCND2							Low
INF_R_102	Yes	Overexpression		HDAC9							Very low
INF_R_103	Yes	Single nucleotide variant		ESR1	c.G1255A	p.E419K	0.54				Borderline
INF_R_103	Yes	Single nucleotide variant		FLT4	c.G3766C	p.E1256Q	0.33				Borderline
INF_R_103	Yes	Single nucleotide variant		SMARCA4	c.G3575T	p.R1192L	0.74				Borderline
INF_R_103	Yes	Other	high SNV count							n = 458	Borderline
INF_R_1037	Yes	Overexpression		FLT3							Intermediate
INF_R_1037	Yes	Overexpression		CD19							Intermediate
INF_R_104	Yes	Amplification		TERT							Moderate
INF_R_104	Yes	Overexpression		VEGFB							Intermediate
INF_R_104	Yes	Overexpression		HRAS							Low
INF_R_105	Yes	Amplification		MYCN							Intermediate
INF_R_105	Yes	Overexpression		VEGFA							Borderline
INF_R_1058	Yes	Single nucleotide variant		EGFR	c.C866A	p.A289D	0.58				Very high
INF_R_1058	Yes	Deletion		CDKN2A/B							Moderate
INF_R_106	Yes	Deletion		CDKN2A/B							Moderate
INF_R_106	Yes	Overexpression		DDR2							Borderline
INF_R_106	Yes	Single nucleotide variant		SMARCA4	c.A3122G	p.Q1041R	0.35				Borderline
INF_R_1076	Yes	Other		SHH							Moderate
INF_R_1076	Yes	Overexpression		NTRK3							Borderline
INF_R_1076	Yes	Other	'BRCAness' positive								NA
INF_R_109	Yes	Overexpression		AXL							Borderline
INF_R_109	Yes	Overexpression		ALK							Borderline
INF_R_110	Yes	Deletion		SMARCB1							Intermediate
INF_R_110	Yes	Overexpression		FGFR1							Borderline
INF_R_110	Yes	Overexpression		EGFR							Borderline
INF_R_110	Yes	Overexpression		ABL1							Borderline
INF_R_111	Yes	InDel		PTEN	c.939dupG	p.K313fs	0.43				High
INF_R_111	Yes	Deletion		CDKN2A/B							Moderate
INF_R_111	Yes	Overexpression		JAK3							Intermediate
INF_R_111	Yes	Overexpression		LCK							Intermediate
INF_R_112	Yes	Single nucleotide variant		FGFR4	c.A1603G	p.N535D	0.20				Moderate
INF_R_112	Yes	Single nucleotide variant		SMARCB1	c.G1130A	p.R377H	0.44				Intermediate
INF_R_113	Yes	Overexpression		KIT							Intermediate
INF_R_114	Yes	Amplification		PIK3CA							High
INF_R_114	Yes	Amplification		EGFR							High
INF_R_114	Yes	Amplification		TERC							Moderate
INF_R_115	No
INF_R_116	Yes	Amplification		MYCN							Intermediate
INF_R_118	Yes	Amplification		PDGFRA							High
INF_R_118	Yes	Overexpression		NTRK3							Intermediate
INF_R_118	Yes	Overexpression		ERBB3							Intermediate
INF_R_119	Yes	Overexpression		PDGFRA							Borderline
INF_R_121	Yes	Overexpression		CCND2							Low
INF_R_122	Yes	Single nucleotide variant		ALK	c.G3824A	p.R1275Q	0.24				Very high
INF_R_122	Yes	Overexpression		VEGFR1							Intermediate
INF_R_125	Yes	Overexpression		KIT							Intermediate
INF_R_125	Yes	Overexpression		CCND1							Low
INF_R_126	Yes	Amplification		IGF1R							Borderline
INF_R_127	Yes	InDel		PDGFRA	c.1156_1158del	p.386_386del	0.25				Moderate
INF_R_127	Yes	Overexpression		DLL1							Low
INF_R_128	Yes	Amplification		MYCN							Intermediate
INF_R_129	Yes	Overexpression		KDM1A							Borderline
INF_R_129	Yes	Overexpression		MET							Borderline
INF_R_129	Yes	Amplification		GAK							Borderline
INF_R_130	Yes	Deletion		CDKN2A/B							Moderate
INF_R_130	Yes	Overexpression		FGFR3							Borderline
INF_R_131	Yes	Overexpression		AXL							Borderline
INF_R_131	Yes	Single nucleotide variant		RET	c.T2125G	p.F709V	0.18				Borderline
INF_R_132	Yes	Deletion		CDKN2A/B							Moderate
INF_R_132	Yes	Single nucleotide variant		PTPRD	c.T3243A	p.Y1081X	0.20				Moderate
INF_R_133	Yes	Overexpression		CD22							Intermediate
INF_R_133	Yes	Overexpression		CD19							Intermediate
INF_R_133	Yes	Fusion						MLL	MLLT10		Intermediate
INF_R_133	Yes	Overexpression		SYK							Very low
INF_R_133	Yes	Overexpression		BTK							Very low
INF_R_133	Yes	Overexpression		PIK3CD							Very low
INF_R_134	Yes	Deletion		CDKN2A/B							Moderate
INF_R_134	Yes	Single nucleotide variant		SMARCA4	c.C3310G	p.Q1104E	0.42				Intermediate
INF_R_134	Yes	Single nucleotide variant		TEK	c.C2383A	p.Q795K	0.29				Borderline
INF_R_135	Yes	Deletion		CDKN2A/B							Moderate
INF_R_135	Yes	Amplification		CXCR4							Moderate
INF_R_136	Yes	Overexpression		VEGFB							Intermediate
INF_R_136	Yes	Overexpression		TERT							Intermediate
INF_R_136	Yes	Single nucleotide variant		AURKB	c.T266C	p.F89S	0.18				Borderline
INF_R_136	Yes	Overexpression		HRAS							Low
INF_R_136	Yes	Other	high SNV count							n = 142	NA
INF_R_137	Yes	Fusion						SS18	SSX1		Intermediate
INF_R_137	Yes	Single nucleotide variant		PIK3R1	c.C430G	p.L144V	0.34				Intermediate
INF_R_139	Yes	Overexpression		NTRK2							Borderline
INF_R_139	Yes	Overexpression		FGFR3							Borderline
INF_R_140	Yes	Single nucleotide variant		EZH2	c.T1936C	p.Y646H	0.44				High
INF_R_140	Yes	InDel		PIK3R1	c.1357_1359del	p.453_453del	0.43				Moderate
INF_R_141	Yes	Overexpression		INSR							Intermediate
INF_R_141	Yes	Overexpression		RET							Borderline
INF_R_141	Yes	InDel		IRS2	c.2096_2104del	p.699_702del	0.18				Low
INF_R_142	Yes	Overexpression		HGF							Borderline
INF_R_143	Yes	Overexpression		RET							Intermediate
INF_R_143	Yes	Amplification		CCND1							Low
INF_R_145	Yes	Amplification		CCND2							High
INF_R_145	Yes	Single nucleotide variant		PIK3R1	c.A1417C	p.T473P	0.77				Moderate
INF_R_145	Yes	Overexpression		NTRK2							Intermediate
INF_R_145	Yes	InDel		CDKN2C	c.453_454insGGTTG	p.E151fs	0.31				Intermediate
INF_R_145	Yes	Amplification		MAP3K1							Low
INF_R_147	Yes	Amplification		CDK4							High
INF_R_147	Yes	Amplification		VEGFA							Moderate
INF_R_148	Yes	Amplification		MET							High
INF_R_148	Yes	Amplification		EGFR							Moderate
INF_R_148	Yes	Amplification		PDGFRA							Moderate
INF_R_148	Yes	Overexpression		MAP2K1							Borderline
INF_R_150	Yes	Single nucleotide variant		CCND2	c.C839A	p.T280N	0.18				Intermediate
INF_R_151	Yes	Single nucleotide variant		SMARCB1	c.C472T	p.R158X	0.79				Intermediate
INF_R_151	Yes	Overexpression		FGFR2							Borderline
INF_R_153	Yes	Fusion						ETV6	NTRK3		Very high
INF_R_153	Yes	Deletion		CDKN2A/B							Intermediate
INF_R_153	Yes	Overexpression		ABL1							Borderline
INF_R_153	Yes	Overexpression		AXL							Borderline
INF_R_154	Yes	Deletion		CDKN2A/B							Intermediate
INF_R_158	Yes	Single nucleotide variant		BRAF	c.T1799A	p.V600E	0.14				High
INF_R_158	Yes	Single nucleotide variant		NRAS	c.C181A	p.Q61K	0.11				Moderate
INF_R_158	Yes	Single nucleotide variant		INSR	c.G2548T	p.A850S	0.09				Borderline
INF_R_159	Yes	Amplification		TERT							Moderate
INF_R_159	Yes	Overexpression		NOTCH4							Very low
INF_R_160	Yes	InDel		PTEN	c.610delC	p.P204fs	0.67				Moderate
INF_R_160	Yes	Amplification		TERT							Borderline
INF_R_160	Yes	Other	'BRCAness' positive								NA
INF_R_164	Yes	Single nucleotide variant		KIT	c.A2447T	p.D816V	0.10				Very high
INF_R_164	Yes	Overexpression		AURKA							Borderline
INF_R_164	Yes	Overexpression		MAP2K2							Borderline
INF_R_164	Yes	Overexpression		CCND3							Low
INF_R_164	Yes	Overexpression		PLK1							Very low
INF_R_165	Yes	Single nucleotide variant		SMARCB1	c.C157T	p.R53X	NA				Intermediate
INF_R_165	Yes	Deletion		CDKN2A/B							Intermediate
INF_R_165	Yes	Overexpression		FGFR1							Borderline
INF_R_165	Yes	Overexpression		ERBB4							Borderline
INF_R_167	Yes	Deletion		PTEN							Moderate
INF_R_167	Yes	Single nucleotide variant		CHEK2	c.C389G	p.A130G	0.21				Borderline
INF_R_167	Yes	Single nucleotide variant		FGFR1	c.C1333T	p.R445W	0.17				Borderline
INF_R_167	Yes	Single nucleotide variant		SOS2	c.C1339G	p.P447A	0.13				Low
INF_R_167	Yes	Other	high SNV count							n = 118	NA
INF_R_168	Yes	Deletion		CDKN2A/B							Moderate
INF_R_169	Yes	Amplification		CDK4							High
INF_R_169	Yes	Amplification		MYC							Intermediate
INF_R_169	Yes	Single nucleotide variant		GLI1	c.C67T	p.P23S	0.70				Borderline
INF_R_172	Yes	Deletion		CDKN2A/B							Intermediate
INF_R_173	No
INF_R_175	Yes	Amplification		MAP2K2							Moderate
INF_R_176	Yes	Single nucleotide variant		CDKN2C	c.G106T	p.G36X	0.81				Intermediate
INF_R_176	Yes	Overexpression		MAP2K2							Borderline
INF_R_176	Yes	Overexpression		HRAS							Low
INF_R_177	Yes	Deletion		PTEN							Moderate
INF_R_177	Yes	Overexpression		VEGFA							Intermediate
INF_R_177	Yes	Overexpression		MYC							Low
INF_R_178	Yes	Single nucleotide variant		TSC1	c.T2420C	p.I807T	0.17				Intermediate
INF_R_178	Yes	Single nucleotide variant		PTCH1	c.G584A	p.R195K	0.19				Intermediate
INF_R_178	Yes	Overexpression		NRG2							Low
INF_R_178	Yes	Overexpression		HSP90B1							Very low
INF_R_180	No
INF_R_181	No
INF_R_182	Yes	Fusion						PEMT	MTOR		Moderate
INF_R_182	Yes	Deletion		CDKN2A							Moderate
INF_R_182	Yes	Amplification		EPHA2							Moderate
INF_R_182	Yes	Overexpression		VEGFA							Intermediate
INF_R_182	Yes	Overexpression		FGFR3							Borderline
INF_R_182	Yes	Single nucleotide variant		FYN	c.G368A	p.R123H	0.26				Borderline
INF_R_183	Yes	Single nucleotide variant		ABL2	c.G136T	p.D46Y	0.46				Borderline
INF_R_183	Yes	Single nucleotide variant		MTOR	c.G1022A	p.G341D	0.43				Borderline
INF_R_184	Yes	Single nucleotide variant		ALK	c.T3520C	p.F1174L	0.24				Very high
INF_R_184	Yes	Overexpression		RET							Intermediate
INF_R_184	Yes	Amplification		MYCN							Intermediate
INF_R_184	Yes	Overexpression		HDAC9							Very low
INF_R_184	Yes	Other	high SNV count							n = 110	NA
INF_R_190	Yes	Deletion		CDKN2A							Moderate
INF_R_191	No
INF_R_192	Yes	Fusion						BRE	ALK		Very high
INF_R_192	Yes	Deletion		CDKN2A							Moderate
INF_R_192	Yes	Amplification		MYCN							Intermediate
INF_R_192	Yes	Single nucleotide variant		ARID1A	c.A3317G	p.K1106R	0.81				Very low
INF_R_193	Yes	InDel		ARID1A	c.132delG	p.A44fs	0.11				Intermediate
INF_R_193	Yes	Single nucleotide variant		PIK3CA	c.G113T	p.R38L	0.43				Intermediate
INF_R_193	Yes	Overexpression		ERBB3							Borderline
INF_R_193	Yes	Single nucleotide variant		FGFR4	c.A1640G	p.Y547C	0.13				Borderline
INF_R_193	Yes	Overexpression		CCND2							Low
INF_R_195	Yes	Single nucleotide variant		NOTCH2	c.C5179T	p.R1727C	0.12				Borderline
INF_R_196	Yes	Single nucleotide variant		NRAS	c.A183T	p.Q61H	0.34				High
INF_R_196	Yes	Single nucleotide variant		EZH2	c.G1505A	p.R502Q	0.24				Moderate
INF_R_197	Yes	Overexpression		RET							Borderline
INF_R_197	Yes	Single nucleotide variant		ARID1A	c.G5932T	p.A1978S	0.10				Very low
INF_R_199	No
INF_R_200	No
INF_R_201	Yes	Amplification		CCND2							Moderate
INF_R_201	Yes	Overexpression		NTRK2							Borderline
INF_R_202	Yes	Overexpression		ALK							Intermediate
INF_R_202	Yes	Overexpression		TGFB2							Very low
INF_R_204	Yes	Fusion						MTAP	RAF1		Moderate
INF_R_204	Yes	Deletion		CDKN2A/B							Moderate
INF_R_204	Yes	Amplification		TERT							Intermediate
INF_R_206	Yes	Single nucleotide variant		KRAS	c.A183C	p.Q61H	0.78				High
INF_R_206	Yes	Overexpression		FGF1							Low
INF_R_207	Yes	Amplification		MDM2							High
INF_R_207	Yes	Amplification		CDK4							High
INF_R_208	Yes	Amplification		CDK4							High
INF_R_209	Yes	Overexpression		RET							Borderline
INF_R_209	Yes	Overexpression		AKT1							Borderline
INF_R_209	Yes	Overexpression		SHH							Low
INF_R_210	Yes	Overexpression		PDGFRB							Borderline
INF_R_211	No
INF_R_212	Yes	Amplification		CDK4							High
INF_R_212	Yes	Single nucleotide variant		NF1	c.G5792A	p.W1931X	0.89				Moderate
INF_R_212	Yes	Overexpression		ERBB3							Intermediate
INF_R_213	Yes	Single nucleotide variant		MTOR	c.G2940T	p.K980N	0.46				Borderline
INF_R_213	Yes	Deletion		NF1							Low
INF_R_215	No
INF_R_216	Yes	Amplification		ALK							High
INF_R_216	Yes	Overexpression		RET							Intermediate
INF_R_216	Yes	Amplification		MYCN							Intermediate
INF_R_217	Yes	Single nucleotide variant		ALK	c.G3824A	p.R1275Q	0.71				Very high
INF_R_219	Yes	Overexpression		KIT							Intermediate
INF_R_220	Yes	InDel		EGFR	c.2309_2310insACAACCCCC	p.D770delinsEQPP	0.15				Moderate
INF_R_220	Yes	Single nucleotide variant		EGFR	c.A2353C	p.T785P	0.20				Moderate
INF_R_220	Yes	Overexpression		TGFB2							Very low
INF_R_221	Yes	InDel		KRAS	c.39_40insGCG	p.V14delinsGV	0.38				Moderate
INF_R_221	Yes	Overexpression		JAK3							Intermediate
INF_R_221	Yes	Single nucleotide variant		PIK3R1	c.C1692A	p.N564K	0.1				Intermediate
INF_R_221	Yes	Overexpression		CD22							Low
INF_R_221	Yes	Overexpression		PDGFA							Low
INF_R_221	Yes	Single nucleotide variant		TP53	c.G743A	p.R248Q	0.2				Very low
INF_R_222	Yes	Fusion						MYH10	RET		High
INF_R_222	Yes	Deletion		CDKN2A/B							Moderate
INF_R_222	Yes	Amplification		TERT							Intermediate
INF_R_222	Yes	Overexpression		PDGFRB							Borderline
INF_R_223	Yes	Deletion		CDKN2A/B							Moderate
INF_R_223	Yes	Overexpression		PDGFRA							Intermediate
INF_R_223	Yes	Single nucleotide variant		RAF1	c.T736G	p.S246A	0.41				Borderline
INF_R_223	Yes	Other	high SNV count							n = 159	NA
INF_R_224	No
INF_R_225	Yes	Single nucleotide variant		KRAS	c.G38A	p.G13D	0.25				High
INF_R_225	Yes	Deletion		CDKN2A/B							Moderate
INF_R_226	No
INF_R_227	No
INF_R_228	No
INF_R_229	Yes	Overexpression		FGFR4							Intermediate
INF_R_229	Yes	Fusion						PAX3	FOXO1		Very low
INF_R_230	Yes	Amplification		MYCN							Intermediate
INF_R_230	Yes	Overexpression		HDAC2							Very low
INF_R_232	Yes	Single nucleotide variant		MTOR	c.A7501T	p.I2501F	0.26				Borderline
INF_R_233	No
INF_R_235	Yes	Overexpression		MDM2							Borderline
INF_R_235	Yes	Single nucleotide variant		NTRK3	c.G804T	p.L268F	0.31				Borderline
INF_R_236	Yes	Single nucleotide variant		NRAS	c.C181A	p.Q61K	0.54				High
INF_R_236	Yes	Overexpression		MAP2K1							Borderline
INF_R_236	Yes	Single nucleotide variant		MST1R	c.G1070T	p.G357V	0.38				Borderline
INF_R_236	Yes	Overexpression		PDGFA							Low
INF_R_237	No
INF_R_238	Yes	Single nucleotide variant		ABL1	c.A893T	p.E298V	0.25				Intermediate
INF_R_238	Yes	Overexpression		FGFR3							Borderline
INF_R_238	Yes	Overexpression		ERBB4							Borderline
INF_R_238	Yes	Overexpression		AURKA							Very low
INF_R_239	Yes	InDel		BRAF	c.1456_1464del	p.486_488del	0.25				Moderate
INF_R_239	Yes	Overexpression		INSR							Borderline
INF_R_239	Yes	Overexpression		BRD4							Borderline
INF_R_239	Yes	Single nucleotide variant		JAK3	c.C2040G	p.S680R	0.18				Borderline
INF_R_239	Yes	Overexpression		NOTCH3							Very low
INF_R_240	Yes	Single nucleotide variant		ALK	c.T3521C	p.F1174S	0.35				Very high
INF_R_240	Yes	Amplification		TERT							Moderate
INF_R_241	Yes	Single nucleotide variant		BRAF	c.T1799A	p.V600E	0.38				Very high
INF_R_241	Yes	Deletion		CDKN2A							Moderate
INF_R_241	Yes	Overexpression		RET							Borderline
INF_R_242	Yes	Amplification		CCNE1							Intermediate
INF_R_242	Yes	Overexpression		FGFR3							Borderline
INF_R_242	Yes	Overexpression		ERBB3							Borderline
INF_R_244	Yes	Overexpression		NTRK3							Borderline
INF_R_244	Yes	Single nucleotide variant		DDR1	c.C68T	p.T23M	0.35				Borderline
INF_R_245	Yes	InDel		CDKN2C	c.348delC	p.L116fs	0.32				Intermediate
INF_R_252	Yes	Deletion		CDKN2A/B							Moderate
INF_R_253	No
INF_R_255	Yes	Overexpression		KIT							Intermediate
INF_R_255	Yes	Overexpression		PDCD1							Low
INF_R_257	Yes	Overexpression		NTRK2							Intermediate
INF_R_257	Yes	Amplification		MYC							Intermediate
INF_R_257	Yes	Overexpression		FGFR3							Borderline
INF_R_258	Yes	Single nucleotide variant		KRAS	c.G38A	p.G13D	0.47				Moderate
INF_R_258	Yes	Overexpression		NOTCH1							Borderline
INF_R_258	Yes	Overexpression		CDK6							Borderline
INF_R_259	Yes	Overexpression		KIT							Intermediate
INF_R_259	Yes	Overexpression		FGF4							Low
INF_R_260	No
INF_R_262	Yes	Single nucleotide variant		BRAF	c.T1799A	p.V600E	0.17				High
INF_R_262	Yes	Deletion		CDKN2A/B							Moderate
INF_R_262	Yes	Amplification		TERT							Intermediate
INF_R_263	No
INF_R_264	Yes	Single nucleotide variant		RET	c.T2753C	p.M918T	0.28				High
INF_R_264	Yes	Overexpression		EPCAM							Low
INF_R_265	Yes	Single nucleotide variant		PIK3CA	c.A3140G	p.H1047R	0.46				High
INF_R_265	Yes	Amplification		CCNE1							Intermediate
INF_R_265	Yes	Amplification		MYC							Intermediate
INF_R_266	Yes	Deletion		CDKN2A/B							Moderate
INF_R_267	Yes	Deletion		CDKN2A/B							Moderate
INF_R_267	Yes	Single nucleotide variant		SRC	c.G756C	p.K252N	0.12				Borderline
INF_R_268	Yes	Deletion		CDKN2A							Intermediate
INF_R_268	Yes	Overexpression		KDR							Borderline
INF_R_268	Yes	Amplification		MYC							Low
INF_R_270	Yes	Amplification		MYCN							Intermediate
INF_R_270	Yes	Overexpression		HDAC2							Very low
INF_R_271	No
INF_R_273	Yes	Amplification		EGFR							High
INF_R_273	Yes	Deletion		NF1							Moderate
INF_R_273	Yes	Amplification		CCND2							Moderate
INF_R_275	Yes	Amplification		MET							High
INF_R_275	Yes	Amplification		PDGFRA							High
INF_R_275	Yes	Overexpression		MAP2K2							Borderline
INF_R_275	Yes	Single nucleotide variant		PIK3CD	c.C1815A	p.D605E	0.12				Borderline
INF_R_275	Yes	Other	high SNV count							n = 118	NA
INF_R_276	Yes	Deletion		CDKN2A/B							Moderate
INF_R_277	Yes	Amplification		TERT							Moderate
INF_R_277	Yes	Single nucleotide variant		IGF1R	c.C1013G	p.T338R	0.18				Borderline
INF_R_277	Yes	Single nucleotide variant		HDAC2	c.G1075T	p.D359Y	0.12				Borderline
INF_R_277	Yes	Single nucleotide variant		CCND1	c.G58T	p.A20S	0.13				Borderline
INF_R_277	Yes	Single nucleotide variant		NF1	c.G2164A + c.G2165T	p.G722M	0.27				Low
INF_R_278	Yes	Amplification		IGF2							Intermediate
INF_R_280	No
INF_R_281	Yes	Single nucleotide variant		ERBB3	c.G2786A	p.R929Q	0.42				Low
INF_R_282	No
INF_R_284	Yes	Amplification		CCNE1							Intermediate
INF_R_284	Yes	Overexpression		AXL							Borderline
INF_R_284	Yes	Amplification		IGF1R							Borderline
INF_R_285	Yes	Overexpression		KIT							Intermediate
INF_R_288	No
INF_R_289	Yes	Overexpression		KIT							Intermediate
INF_R_290	Yes	Single nucleotide variant		NRAS	c.C181A	p.Q61K	0.31				High
INF_R_290	Yes	Deletion		CDKN2A/B							Moderate
INF_R_290	Yes	Single nucleotide variant		BRAF	c.G1786C	p.G596R	0.34				Moderate
INF_R_290	Yes	Single nucleotide variant		PIK3CA	c.G1624A	p.E542K	0.39				Intermediate
INF_R_291	Yes	Deletion		PTEN							Moderate
INF_R_291	Yes	Deletion		CDKN2A							Moderate
INF_R_291	Yes	Amplification		VEGFA							Moderate
INF_R_291	Yes	Overexpression		AXL							Borderline
INF_R_291	Yes	Other	high SNV count							n = 121	NA
INF_R_292	Yes	Fusion						PRKAR2A	ALK		High
INF_R_293	No
INF_R_294	Yes	Fusion						TPR	NTRK1		High
INF_R_295	Yes	Single nucleotide variant		BRAF	c.C1712T	p.S571L	0.39				Intermediate
INF_R_296	Yes	Amplification		MYC							Intermediate
INF_R_296	Yes	Overexpression		KDM1A							Borderline
INF_R_297	Yes	Amplification		MDM2							Moderate
INF_R_297	Yes	Amplification		AKT1							Intermediate
INF_R_298	No
INF_R_301	Yes	Deletion		SMARCB1							Intermediate
INF_R_302	Yes	Single nucleotide variant		BRAF	c.T1799A	p.V600E	0.27				Very high
INF_R_302	Yes	Deletion		CDKN2A/B							Moderate
INF_R_302	Yes	Overexpression		IGF1R							Borderline
INF_R_304	No
INF_R_305	Yes	Other	high SNV count							n = 5375	Intermediate
INF_R_306	Yes	Fusion						LMNA	NTRK1		High
INF_R_307	Yes	Deletion		SMARCB1							Intermediate
INF_R_307	Yes	Overexpression		ABL1							Borderline
INF_R_308	No
INF_R_312	Yes	Overexpression		FGF3							Low
INF_R_313	Yes	Fusion						TPM3	NTRK1		High
INF_R_313	Yes	Deletion		CDKN2A/B							Moderate
INF_R_313	Yes	Deletion		NF1							Intermediate
INF_R_313	Yes	Amplification		TERT							Intermediate
INF_R_313	Yes	Overexpression		PDGFRB							Borderline
INF_R_313	Yes	Overexpression		CTLA4							Very low
INF_R_314	Yes	Deletion		CDKN2A/B							Moderate
INF_R_314	Yes	Overexpression		MERTK							Borderline
INF_R_315	Yes	Overexpression		ABL1							Borderline
INF_R_315	Yes	Single nucleotide variant		PDGFRB	c.G1478A	p.S493N	0.47				Very low
INF_R_316	No
INF_R_317	Yes	Overexpression		ERBB2							Borderline
INF_R_317	Yes	Single nucleotide variant		HDAC7	c.G1054A	p.D352N	0.47				Borderline
INF_R_318	Yes	Overexpression		PIK3CA							Borderline
INF_R_318	Yes	Overexpression		EPHA2							Borderline
INF_R_318	Yes	Overexpression		NRG1							Low
INF_R_320	Yes	Single nucleotide variant		PDGFRA	c.G704T	p.C235F	0.65				Moderate
INF_R_321	Yes	Fusion						EBF1	PDGFRB		Very high
INF_R_321	Yes	Overexpression		MTOR							Borderline
INF_R_321	Yes	Overexpression		MAP2K1							Borderline
INF_R_321	Yes	Overexpression		RAF1							Borderline
INF_R_321	Yes	Single nucleotide variant		DOT1L	c.C911T	p.S304L	0.06				Low
INF_R_322	Yes	Amplification		CDK4							High
INF_R_322	Yes	Overexpression		FGFR4							Intermediate
INF_R_322	Yes	Amplification		HDAC5							Borderline
INF_R_323	Yes	Single nucleotide variant		ALK	c.C3522A	p.F1174L	0.89				Very high
INF_R_323	Yes	Amplification		MYCN							Intermediate
INF_R_323	Yes	Single nucleotide variant		SMARCA4	c.C2752T	p.L918F	0.85				Intermediate
INF_R_324	Yes	Overexpression		HDAC2							Very low
INF_R_325	No
INF_R_326	No
INF_R_328	Yes	Deletion		CDKN2A/B							Moderate
INF_R_330	Yes	Overexpression		PDGFRB							Intermediate
INF_R_331	No
INF_R_332	Yes	Deletion		CDKN2A/B							Moderate
INF_R_332	Yes	Overexpression		BCL2							Borderline
INF_R_332	Yes	Overexpression		PTCH1							Low
INF_R_332	Yes	Overexpression		TNFSF11							Very low
INF_R_333	Yes	Deletion		PTEN							Moderate
INF_R_333	Yes	Single nucleotide variant		CDKN2A	c.C172T	p.R58X	0.89				Moderate
INF_R_333	Yes	InDel		PIK3R1	c.1373_1375del	p.458_459del	0.15				Intermediate
INF_R_333	Yes	Overexpression		PDCD1							Low
INF_R_333	Yes	Fusion						NOTCH1	IKZF2		Very low
INF_R_333	Yes	Single nucleotide variant		AURKB	c.G400A	p.E134K	0.08				Very low
INF_R_336	No
INF_R_337	No
INF_R_339	Yes	Amplification		MYCN							Intermediate
INF_R_341	No
INF_R_342	No
INF_R_343	Yes	Overexpression		CCND1							Low
INF_R_343	Yes	Overexpression		MERTK							Low
INF_R_344	Yes	Single nucleotide variant		BRAF	c.T1799A	p.V600E	0.57				High
INF_R_344	Yes	Amplification		MYCN							Intermediate
INF_R_344	Yes	Overexpression		RET							Borderline
INF_R_344	Yes	Overexpression		PLK1							Low
INF_R_344	Yes	Other	high SNV count							n = 117	NA
INF_R_346	Yes	Single nucleotide variant		TSC2	c.A2497T	p.N833Y	0.09				Intermediate
INF_R_346	Yes	Single nucleotide variant		HDAC2	c.G271C	p.A91P	0.19				Borderline
INF_R_347	Yes	Single nucleotide variant		NF1	c.C5313A	p.C1771X	0.69				Moderate
INF_R_347	Yes	Overexpression		INSR							Borderline
INF_R_347	Yes	Single nucleotide variant		NTRK2	c.G1945T	p.G649C	0.07				Borderline
INF_R_347	Yes	Overexpression		NOTCH4							Very low
INF_R_347	Yes	Other	high SNV count							n = 188	NA
INF_R_348	Yes	Fusion						TGF	ROS1		Very high
INF_R_348	Yes	Single nucleotide variant		KRAS	c.C64A	p.Q22K	0.08				Moderate
INF_R_349	Yes	Overexpression		PIK3CA							Intermediate
INF_R_349	Yes	Single nucleotide variant		SMARCB1	c.C655T	p.R219X	0.67				Intermediate
INF_R_349	Yes	Overexpression		NRG1							Low
INF_R_350	Yes	Overexpression		MERTK							Intermediate
INF_R_350	Yes	Overexpression		BLK							Intermediate
INF_R_350	Yes	Fusion						TCF3	PBX1		Low
INF_R_351	Yes	Amplification		MDM2							High
INF_R_351	Yes	Amplification		CDK4							High
INF_R_351	Yes	Deletion		CDKN2A/B							Moderate
INF_R_351	Yes	Overexpression		PDGFRB							Borderline
INF_R_351	Yes	Amplification		AR							Borderline
INF_R_351	Yes	Amplification		GLI1							Borderline
INF_R_352	No
INF_R_353	Yes	Overexpression		EPHA3							Borderline
INF_R_353	Yes	Overexpression		KIT							Borderline
INF_R_353	Yes	Overexpression		FGF4							Low
INF_R_353	Yes	Single nucleotide variant		NF1	c.G3469A	p.V1157I	0.39				Low
INF_R_354	Yes	Overexpression		DDR2							Borderline
INF_R_354	Yes	Overexpression		AURKA							Very low
INF_R_354	Yes	Other	'BRCAness' positive								NA
INF_R_355	Yes	Single nucleotide variant		AURKB	c.A637T	p.I213F	0.29				Borderline
INF_R_355	Yes	Overexpression		ERBB3							Borderline
INF_R_355	Yes	Overexpression		CCND2							Low
INF_R_356	No
INF_R_357	Yes	Overexpression		FLT1							Borderline
INF_R_357	Yes	Overexpression		MAPK3							Very low
INF_R_357	Yes	Overexpression		CD274							NA
INF_R_358	Yes	Deletion		NF1							Moderate
INF_R_358	Yes	Deletion		CDKN2C							Intermediate
INF_R_358	Yes	Single nucleotide variant		SMARCA4	c.C2673A	p.C891X	0.59				Intermediate
INF_R_358	Yes	Overexpression		PDGFRB							Borderline
INF_R_358	Yes	Overexpression		TGFB3							Very low
INF_R_358	Yes	Overexpression		NOTCH3							Very low
INF_R_359	Yes	Amplification		MYCN							Intermediate
INF_R_360	Yes	Amplification		FGFR3							Moderate
INF_R_360	Yes	Single nucleotide variant		INSR	c.A3083T	p.E1028V	0.4				Borderline
INF_R_360	Yes	Amplification		RPTOR							Low
INF_R_360	Yes	Other	'BRCAness' positive								NA
INF_R_361	Yes	Deletion		CDKN2A/B							Moderate
INF_R_361	Yes	Overexpression		MAP2K2							Borderline
INF_R_361	Yes	Overexpression		ABL1							Borderline
INF_R_361	Yes	Overexpression		FGFR1							Borderline
INF_R_361	Yes	Overexpression		VEGFA							Borderline
INF_R_361	Yes	Overexpression		AXL							Borderline
INF_R_362	Yes	Fusion						EML4	NTRK3		Very high
INF_R_362	Yes	Deletion		CDKN2A/B							Moderate
INF_R_362	Yes	Overexpression		ABL1							Intermediate
INF_R_362	Yes	Overexpression		PDGFRB							Borderline
INF_R_362	Yes	Overexpression		CTLA4							Very low
INF_R_363	Yes	Amplification		KIT							Moderate
INF_R_367	Yes	Other		FGFR1							Very high
INF_R_368	Yes	Fusion						LPIN	ALK		Intermediate
INF_R_368	Yes	Overexpression		HGF							Borderline
INF_R_374	No
INF_R_375	Yes	Single nucleotide variant		PIK3CA	c.C1636A	p.Q546K	0.18				Moderate
INF_R_377	Yes	Deletion		CDKN2A/B							Moderate
INF_R_378	Yes	Amplification		MDM2							Moderate
INF_R_378	Yes	Amplification		HDAC4							Borderline
INF_R_378	Yes	Other	'BRCAness' positive								NA
INF_R_380	Yes	Other	'BRCAness' positive								NA
INF_R_381	Yes	Overexpression		ERBB4							Borderline
INF_R_381	Yes	Overexpression		AURKA							Very low
INF_R_382	Yes	Amplification		BRD4							Moderate
INF_R_382	Yes	Amplification		MYC							Intermediate
INF_R_382	Yes	Overexpression		ESR1							Very low
INF_R_382	Yes	Other	'BRCAness' positive								NA
INF_R_383	Yes	Amplification		CDK4							High
INF_R_383	Yes	Deletion		CDKN2A/B							Moderate
INF_R_383	Yes	Other	'BRCAness' positive								NA
INF_R_384	Yes	Single nucleotide variant		BRAF	c.T1799A	p.V600E	0.32				Very high
INF_R_384	Yes	Deletion		NF1							Moderate
INF_R_384	Yes	Deletion		CDKN2A/B							Moderate
INF_R_384	Yes	Overexpression		PDGFA							Low
INF_R_386	Yes	Amplification		KIT							Moderate
INF_R_386	Yes	Amplification		CCND2							Intermediate
INF_R_386	Yes	Overexpression		MET							Borderline
INF_R_386	Yes	Overexpression		ERBB3							Borderline
INF_R_386	Yes	Amplification		HDAC1							Borderline
INF_R_386	Yes	Overexpression		SOS1							Low
INF_R_387	Yes	Overexpression		VEGFA							Intermediate
INF_R_387	Yes	Amplification		MYC							Intermediate
INF_R_387	Yes	Other	'BRCAness' positive								NA
INF_R_389	Yes	Overexpression		AKT3							Borderline
INF_R_389	Yes	Overexpression		HDAC9							Very low
INF_R_390	Yes	Overexpression		TERT							Intermediate
INF_R_391	Yes	Amplification		MYCN							Intermediate
INF_R_391	Yes	Overexpression		KIT							Borderline
INF_R_391	Yes	Overexpression		ABL1							Borderline
INF_R_391	Yes	Single nucleotide variant		CRKL	c.G850T	p.G284W	0.39				Very low
INF_R_392	No
INF_R_393	Yes	Amplification		CCND2							Intermediate
INF_R_395	No
INF_R_396	Yes	Deletion		CDKN2A/B							Moderate
INF_R_396	Yes	Single nucleotide variant		MTOR	c.G6016T	p.V2006F	0.33				Moderate
INF_R_396	Yes	Single nucleotide variant		PTEN	c.A502G	p.I168V	0.25				Moderate
INF_R_397	Yes	Single nucleotide variant		PTCH1	c.G1474T	p.G492X	0.17				Intermediate
INF_R_398	Yes	Overexpression		FGFR2							Borderline
INF_R_398	Yes	Overexpression		SMO							Borderline
INF_R_398	Yes	Overexpression		AURKA							Low
INF_R_398	Yes	Other	'BRCAness' positive								NA
INF_R_399	Yes	Overexpression		NTRK1							Borderline
INF_R_400	Yes	Overexpression		MAP2K1							Borderline
INF_R_400	Yes	Overexpression		NRG1							Low
INF_R_401	Yes	Deletion		PTEN							Moderate
INF_R_401	Yes	Deletion		PTCH1							Intermediate
INF_R_401	Yes	Amplification		MYCN							Intermediate
INF_R_402	No
INF_R_403	Yes	Overexpression		EPHA2							Intermediate
INF_R_403	Yes	Single nucleotide variant		ERBB4	c.G433C	p.G145R	0.4				Borderline
INF_R_403	Yes	Other	'BRCAness' positive								NA
INF_R_403	Yes	Other	high SNV count							n = 122	NA
INF_R_404	Yes	Overexpression		CDK6							Borderline
INF_R_404	Yes	Overexpression		PTCH1							Low
INF_R_405	Yes	InDel		CDKN2A	c.180_183del	p.60_61del	0.39				Intermediate
INF_R_406	Yes	Amplification		MYC							Intermediate
INF_R_406	Yes	Other	'BRCAness' positive								NA
INF_R_407	Yes	Amplification		VEGFA							Moderate
INF_R_408	No
INF_R_409	No
INF_R_410	No
INF_R_411	Yes	Other	'BRCAness' positive								NA
INF_R_413	Yes	Deletion		CDKN2A/B							Moderate
INF_R_414	Yes	Amplification		MYCN							Intermediate
INF_R_415	Yes	Amplification		MYCN							Intermediate
INF_R_415	Yes	Overexpression		RET							Borderline
INF_R_415	Yes	Overexpression		MAP2K1							Borderline
INF_R_415	Yes	Overexpression		FGF1							Low
INF_R_418	Yes	Overexpression		FLT1							Borderline
INF_R_419	Yes	Overexpression		FLT1							Borderline
INF_R_419	Yes	Overexpression		RHEB							Low
INF_R_422	Yes	Single nucleotide variant		ACVR2A	c.G259T	p.D87Y	0.19				Borderline
INF_R_422	Yes	Overexpression		GLI2							Borderline
INF_R_422	Yes	Overexpression		FGFR2							Borderline
INF_R_423	Yes	Single nucleotide variant		TEK	c.G2684C	p.R895P	0.38				Borderline
INF_R_423	Yes	Overexpression		AKT2							Borderline
INF_R_423	Yes	Overexpression		MAP2K2							Borderline
INF_R_423	Yes	Other	'BRCAness' positive								NA
INF_R_424	Yes	Single nucleotide variant		PRKCB	c.C504G	p.I168M	0.39				Borderline
INF_R_425	Yes	Amplification		VEGFA							Moderate
INF_R_425	Yes	Deletion		CDKN2A/B							Moderate
INF_R_425	Yes	Overexpression		EPHA3							Borderline
INF_R_426	Yes	Amplification		FGFR3							Borderline
INF_R_426	Yes	Single nucleotide variant		HDAC9	c.C581G	p.P194R	0.22				Very low
INF_R_427	Yes	InDel		SMARCB1	c.478delA	p.K160fs	NA				Intermediate
INF_R_428	Yes	Overexpression		BCL2							Borderline
INF_R_428	Yes	Overexpression		AXL							Borderline
INF_R_428	Yes	Overexpression		ABL1							Borderline
INF_R_429	No
INF_R_430	No
INF_R_431	Yes	Fusion						PTPRZ1	MET		Very high
INF_R_431	Yes	Deletion		CDKN2A/B							Moderate
INF_R_432	Yes	Fusion						BRD4	NUTM1		Very high
INF_R_432	Yes	Overexpression		NRG1							Low
INF_R_433	No
INF_R_434	Yes	Overexpression		EPHA2							Borderline
INF_R_434	Yes	Overexpression		TGFB1							Very low
INF_R_435	Yes	Fusion						FGFR3	TACC3		Very high
INF_R_435	Yes	Amplification		CDK4							High
INF_R_435	Yes	Amplification		MDM2							High
INF_R_435	Yes	Single nucleotide variant		PIK3R1	c.G1126A	p.G376R	0.11				Moderate
INF_R_435	Yes	Single nucleotide variant		NF1	c.G3655A	p.G1219R	0.37				Low
INF_R_435	Yes	Overexpression		NOTCH2							Very low
INF_R_436	Yes	InDel		NF1	c.3804_3805del	p.1268_1269del	0.34				Moderate
INF_R_436	Yes	Single nucleotide variant		FGFR2	c.G1352A	p.G451E	0.52				Moderate
INF_R_437	Yes	Deletion		CDKN2A/B							Moderate
INF_R_437	Yes	Amplification		MYCL							Intermediate
INF_R_438	Yes	Overexpression		JAK2							Borderline
INF_R_439	No
INF_R_440	No
INF_R_441	Yes	Deletion		CDKN2A/B							Moderate
INF_R_442	Yes	Single nucleotide variant		ALK	c.G3824A	p.R1275Q	0.12				Very high
INF_R_444	Yes	Overexpression		KDR							Intermediate
INF_R_444	Yes	Overexpression		NTRK3							Borderline
INF_R_444	Yes	Single nucleotide variant		EPHA3	c.C1379T	p.P460L	0.44				Low
INF_R_445	Yes	Deletion		SMARCB1							Intermediate
INF_R_446	Yes	Fusion						SQSTM1	NTRK1		Very high
INF_R_447	Yes	Single nucleotide variant		PIK3CA	c.A3140G	p.H1047R	0.45				Moderate
INF_R_447	Yes	Other	high SNV count							n = 172	Intermediate
INF_R_447	Yes	Single nucleotide variant		ALK	c.T3167A	p.M1056K	0.49				Very low
INF_R_448	Yes	Amplification		CDK4							High
INF_R_449	Yes	Amplification		KRAS							High
INF_R_449	Yes	Amplification		PDGFRA							Moderate
INF_R_450	No
INF_R_452	Yes	Single nucleotide variant		TSC2	c.G1742T	p.S581I	0.34				Low
INF_R_453	Yes	Amplification		MYCN							Intermediate
INF_R_454	Yes	Overexpression		CCND1							Low
INF_R_455	Yes	Overexpression		AKT2							Intermediate
INF_R_455	Yes	Overexpression		ALK							Intermediate
INF_R_455	Yes	Overexpression		BRD3							Borderline
INF_R_455	Yes	Overexpression		CCND2							Low
INF_R_456	Yes	Single nucleotide variant		NF1	c.A5407C	p.I1803L	0.05				Low
INF_R_456	Yes	Single nucleotide variant		CCND1	c.T583C	p.F195L	0.05				Low
INF_R_457	Yes	Amplification		ALK							High
INF_R_457	Yes	Overexpression		VEGFA							Intermediate
INF_R_457	Yes	Amplification		MYCN							Intermediate
INF_R_459	No
INF_R_462	Yes	Single nucleotide variant		NRAS	c.C181A	p.Q61K	0.48				High
INF_R_462	Yes	Deletion		CDKN2A/B							Moderate
INF_R_462	Yes	Single nucleotide variant		SMARCB1	c.G1130A	p.R377H	0.47				Intermediate
INF_R_462	Yes	Overexpression		RET							Borderline
INF_R_463	Yes	Amplification		MYC							Intermediate
INF_R_463	Yes	Overexpression		CCND2							Low
INF_R_463	Yes	Single nucleotide variant		DOT1L	c.C4494G	p.F1498L	0.25				Very low
INF_R_463	Yes	Overexpression		CRKL							Very low
INF_R_464	Yes	Overexpression		JAK2							Borderline
INF_R_464	Yes	Amplification		MYC							Low
INF_R_464	Yes	Overexpression		PIK3CB							Very low
INF_R_464	Yes	Other	high SNV count							n = 122	NA
INF_R_466	No
INF_R_467	Yes	Deletion		CDKN2A/B							Moderate
INF_R_468	Yes	Deletion		CDKN2A/B							Moderate
INF_R_468	Yes	Single nucleotide variant		NTRK1	c.C1024T	p.R342W	0.44				Intermediate
INF_R_471	Yes	Amplification		VEGFA							Intermediate
INF_R_471	Yes	Overexpression		MERTK							Borderline
INF_R_471	Yes	Overexpression		AURKA							Borderline
INF_R_472	Yes	InDel		PIK3CA	c.323_334del	p.108_112del	0.24				Moderate
INF_R_473	Yes	Amplification		ABL2							Borderline
INF_R_473	Yes	Single nucleotide variant		DOT1L	c.G2979T	p.Q993H	0.09				Very low
INF_R_477	No
INF_R_478	Yes	Single nucleotide variant		HRAS	c.G37C	p.G13R	0.86				High
INF_R_479	No
INF_R_481	No
INF_R_482	Yes	Single nucleotide variant		NRAS	c.A182G	p.Q61R	0.4				High
INF_R_482	Yes	Amplification		TERT							Intermediate
INF_R_482	Yes	Overexpression		SRC							Borderline
INF_R_482	Yes	Overexpression		RET							Borderline
INF_R_484	Yes	Overexpression		ALK							Intermediate
INF_R_484	Yes	Overexpression		FGFR4							Intermediate
INF_R_484	Yes	Overexpression		NOTCH1							Very low
INF_R_485	Yes	Single nucleotide variant		RARA	c.C125A	p.T42N	0.35				Borderline
INF_R_485	Yes	Single nucleotide variant		FGFR1	c.T904C	p.S302P	0.26				Borderline
INF_R_485	Yes	Single nucleotide variant		BRAF	c.C1165T	p.R389C	0.11				Borderline
INF_R_485	Yes	Overexpression		RHEB							Very low
INF_R_487	Yes	Overexpression		KIT							Intermediate
INF_R_487	Yes	Single nucleotide variant		NTRK2	c.G64A	p.V22I	0.06				Borderline
INF_R_487	Yes	Single nucleotide variant		JAK1	c.G1411C	p.D471H	0.35				Borderline
INF_R_487	Yes	Single nucleotide variant		MERTK	c.G90T	p.K30N	0.13				Borderline
INF_R_489	Yes	Single nucleotide variant		ALK	c.G3824A	p.R1275Q	0.68				Very high
INF_R_489	Yes	Single nucleotide variant		PIK3CB	c.C2918G	p.T973R	0.53				Intermediate
INF_R_489	Yes	Overexpression		VEGFB							Borderline
INF_R_492	Yes	Overexpression		ERBB2							Borderline
INF_R_492	Yes	Overexpression		ABL1							Borderline
INF_R_492	Yes	Overexpression		KDR							Borderline
INF_R_496	Yes	Overexpression		MAPK1							Low
INF_R_496	Yes	Overexpression		ABL2							Very low
INF_R_498	Yes	Single nucleotide variant		NF1	c.C1105T	p.Q369X	0.67				Intermediate
INF_R_498	Yes	Single nucleotide variant		KRAS	c.A349G	p.K117E	0.21				Intermediate
INF_R_498	Yes	Overexpression		FGFR1							Borderline
INF_R_502	Yes	Overexpression		NRAS							Low
INF_R_503	Yes	Single nucleotide variant		ALK	c.G3824A	p.R1275Q	0.52				High
INF_R_503	Yes	Amplification		MYCN							Intermediate
INF_R_509	Yes	Overexpression		PRKCD							Borderline
INF_R_509	Yes	Amplification		MYC							Low
INF_R_509	Yes	Single nucleotide variant		SMO	c.C1261T	p.R421X	0.87				Very low
INF_R_510	Yes	Fusion						CAPZA2	MET		High
INF_R_510	Yes	Amplification		PDGFRA							Moderate
INF_R_511	Yes	Other	high SNV count							n = 147	Intermediate
INF_R_511	Yes	Single nucleotide variant		EPHA2	c.G700T	p.A234S	0.08				Borderline
INF_R_512	Yes	Single nucleotide variant		ALK	c.T3733G	p.F1245V	0.96				Very high
INF_R_512	Yes	Amplification		MYCN							Intermediate
INF_R_512	Yes	Amplification		KRAS							Borderline
INF_R_512	Yes	Overexpression		HDAC2							Very low
INF_R_512	Yes	Overexpression		HSP90B1							Very low
INF_R_513	Yes	Single nucleotide variant		BRAF	c.T1799A	p.V600E	0.35				Very high
INF_R_513	Yes	Deletion		CDKN2A/B							Moderate
INF_R_513	Yes	Single nucleotide variant		PTEN	c.1027-1G>A	NA	0.08				Moderate
INF_R_513	Yes	Overexpression		MAP2K1							Intermediate
INF_R_513	Yes	Overexpression		TYRO3							Borderline
INF_R_514	Yes	Overexpression		MET							Borderline
INF_R_514	Yes	Single nucleotide variant		MAP3K1	c.G775A	p.G259S	0.16				Low
INF_R_514	Yes	Overexpression		TGFB3							Very low
INF_R_517	Yes	Overexpression		AURKA							Borderline
INF_R_517	Yes	Overexpression		CDK7							Borderline
INF_R_517	Yes	Overexpression		PIK3CB							Low
INF_R_517	Yes	Single nucleotide variant		SOS1	c.G988T	p.G330C	0.19				Low
INF_R_517	Yes	Other	high SNV count							n = 101	NA
INF_R_518	Yes	Single nucleotide variant		NRAS	c.G35A	p.G12D	0.24				High
INF_R_518	Yes	Single nucleotide variant		BRAF	c.G1405A	p.G469R	0.16				Moderate
INF_R_518	Yes	Single nucleotide variant		XPO1	c.G1711A	p.E571K	0.23				Borderline
INF_R_520	Yes	Amplification		CDK4							High
INF_R_520	Yes	Overexpression		FGFR4							Intermediate
INF_R_520	Yes	Overexpression		BRD3							Borderline
INF_R_524	Yes	InDel		CDKN2A	c.171dupC	p.R58fs	0.7				Moderate
INF_R_525	Yes	Amplification		MYCN							Intermediate
INF_R_525	Yes	Overexpression		ACVR2A							Low
INF_R_527	Yes	Amplification		MYCN							Intermediate
INF_R_531	No
INF_R_534	Yes	Deletion		CDKN2A/B							Moderate
INF_R_534	Yes	Overexpression		HDAC4							Borderline
INF_R_534	Yes	Overexpression		CDK2							Borderline
INF_R_534	Yes	Overexpression		NOTCH1							Borderline
INF_R_536	Yes	Overexpression		AURKA							Borderline
INF_R_536	Yes	Single nucleotide variant		DDR2	c.G2516A	p.R839H	0.31				Borderline
INF_R_537	Yes	Amplification		TERT							Intermediate
INF_R_537	Yes	Single nucleotide variant		JAK1	c.G2707A	p.E903K	0.19				Borderline
INF_R_537	Yes	Overexpression		CCND2							Low
INF_R_537	Yes	Overexpression		HRAS							Low
INF_R_537	Yes	Overexpression		ACVR2A							Low
INF_R_538	Yes	Overexpression		FGFR3							Borderline
INF_R_538	Yes	Overexpression		ERBB3							Low
INF_R_539	Yes	Deletion		PTEN							Moderate
INF_R_540	Yes	Overexpression		MST1R							Borderline
INF_R_540	Yes	Overexpression		TGFB2							Very low
INF_R_541	Yes	Deletion		SMARCB1							Intermediate
INF_R_543	Yes	Amplification		CDK4							High
INF_R_543	Yes	Amplification		IGFBP2							Low
INF_R_544	No
INF_R_550	Yes	Single nucleotide variant		NRAS	c.A182T	p.Q61L	0.43				High
INF_R_550	Yes	Overexpression		CCND2							Low
INF_R_555	No
INF_R_556	Yes	Amplification		CDK4							High
INF_R_556	Yes	Amplification		VEGFA							Moderate
INF_R_556	Yes	Amplification		PDGFD							Moderate
INF_R_556	Yes	Overexpression		MAPK14							Low
INF_R_556	Yes	Overexpression		SYK							Very low
INF_R_556	Yes	Other	'BRCAness' positive								NA
INF_R_557	Yes	Single nucleotide variant		SMARCA4	c.G4844C	p.R1615P	0.23				Intermediate
INF_R_557	Yes	Overexpression		EPHA2							Borderline
INF_R_557	Yes	Overexpression		GLI3							Low
INF_R_557	Yes	Overexpression		NRG1							Low
INF_R_558	Yes	Overexpression		HGF							Low
INF_R_561	Yes	Deletion		CDKN2A/B							Moderate
INF_R_561	Yes	InDel		MYC	c.211_212insGTCGCC	p.L71delinsRRL	0.17				Moderate
INF_R_561	Yes	Single nucleotide variant		NOTCH1	c.T4787A	p.L1596H	0.47				Moderate
INF_R_561	Yes	Overexpression		PRKCH							Intermediate
INF_R_561	Yes	Single nucleotide variant		JAK1	c.C2882G	p.S961W	0.33				Borderline
INF_R_561	Yes	Deletion		SMARCA4							Very low
INF_R_563	Yes	Overexpression		GLI2							Borderline
INF_R_567	Yes	Amplification		CDK6							High
INF_R_570	No
INF_R_573	Yes	Single nucleotide variant		PTPN11	c.G226C	p.E76Q	0.42				Intermediate
INF_R_573	Yes	Overexpression		BCL2							Borderline
INF_R_573	Yes	Single nucleotide variant		DNMT3B	c.G1672C	p.A558P	0.47				Borderline
INF_R_573	Yes	Overexpression		BTK							Very low
INF_R_574	Yes	Amplification		CCND1							Moderate
INF_R_575	Yes	Amplification		TERT							Intermediate
INF_R_576	Yes	Overexpression		HDAC9							Intermediate
INF_R_576	Yes	Overexpression		FLT4							Borderline
INF_R_579	Yes	Amplification		CDK4							High
INF_R_579	Yes	Overexpression		HDAC6							Borderline
INF_R_579	Yes	Overexpression		ERBB3							Borderline
INF_R_579	Yes	Amplification		TGFB3							Very low
INF_R_580	No
INF_R_583	Yes	Single nucleotide variant		EGFR	c.559+2T>A	NA	0.07				Very low
INF_R_585	Yes	Single nucleotide variant		TEK	c.T392C	p.M131T	0.12				Borderline
INF_R_585	Yes	Overexpression		SMO							Low
INF_R_593	Yes	Fusion						MLL	MLLT10		Intermediate
INF_R_593	Yes	Overexpression		SYK							Very low
INF_R_594	Yes	Fusion						DGKI	MET		Very high
INF_R_594	Yes	Other	high SNV count							n = 5173	Intermediate
INF_R_599	Yes	Amplification		MYC							Intermediate
INF_R_599	Yes	Amplification		GLI2							Borderline
INF_R_599	Yes	Amplification		HDAC3							Borderline
INF_R_599	Yes	Other	'BRCAness' positive
INF_R_600	Yes	Overexpression		NTRK3							Intermediate
INF_R_600	Yes	Overexpression		TYRO3							Borderline
INF_R_600	Yes	Overexpression		TGFB3							Very low
INF_R_603	Yes	Single nucleotide variant		ALK	c.G3824A	p.R1275Q	0.37				Very high
INF_R_603	Yes	Overexpression		ERBB4							Borderline
INF_R_603	Yes	Overexpression		CDK9							Borderline
INF_R_603	Yes	Overexpression		HDAC11							Very low
INF_R_604	Yes	Overexpression		ERBB4							Borderline
INF_R_604	Yes	Overexpression		TYRO3							Borderline
INF_R_604	Yes	Overexpression		EPHA2							Borderline
INF_R_609	Yes	Deletion		PTEN							Moderate
INF_R_609	Yes	Deletion		CDKN2A/B							Moderate
INF_R_609	Yes	Single nucleotide variant		PIK3CA	c.A1637G	p.Q546R	0.24				Moderate
INF_R_609	Yes	Single nucleotide variant		SMARCA4	c.C2653T	p.R885C	0.21				Borderline
INF_R_611	Yes	Other	'BRCAness' positive
INF_R_612	Yes	Amplification		CCND3							Moderate
INF_R_612	Yes	Overexpression		VEGFA							Intermediate
INF_R_612	Yes	Overexpression		FGFR3							Borderline
INF_R_612	Yes	Overexpression		AURKB							Borderline
INF_R_614	No
INF_R_621	Yes	Amplification		MYCN							Intermediate
INF_R_621	Yes	InDel		ATM							NA
INF_R_622	Yes	Single nucleotide variant		MTOR	c.C4376A	p.A1459D	0.24				Borderline
INF_R_622	Yes	Single nucleotide variant		MAX	c.G179A	p.R60Q	0.47				Very low
INF_R_623	No
INF_R_626	Yes	Overexpression		BTK							Intermediate
INF_R_626	Yes	Fusion						MLL	MLLT3		Intermediate
INF_R_631	Yes	Amplification		MDM2							Moderate
INF_R_631	Yes	Overexpression		AURKA							Very low
INF_R_637	Yes	Amplification		VEGFA							Moderate
INF_R_637	Yes	Overexpression		KIT							Borderline
INF_R_637	Yes	Overexpression		SRC							Very low
INF_R_639	Yes	Single nucleotide variant		NF1	c.C7843T	p.Q2615X	0.18				High
INF_R_639	Yes	Deletion		CDKN2A/B							Moderate
INF_R_639	Yes	Single nucleotide variant		PTPN11	c.G1508T	p.G503V	0.25				Moderate
INF_R_639	Yes	Single nucleotide variant		VEGFB	c.A382C	p.K128Q	0.24				Borderline
INF_R_640	Yes	Amplification		CCND2							Moderate
INF_R_640	Yes	Deletion		CDKN2A/B							Moderate
INF_R_640	Yes	Amplification		KIT, PDGFRA, KDR							Moderate
INF_R_640	Yes	Other	'BRCAness' positive								NA
INF_R_641	Yes	Deletion		NF1							Intermediate
INF_R_641	Yes	Overexpression		SRC							Intermediate
INF_R_641	Yes	Overexpression		AXL							Borderline
INF_R_641	Yes	Deletion		SUFU							Low
INF_R_642	Yes	Deletion		CDKN2A/B							Moderate
INF_R_642	Yes	Overexpression		EZH2							Intermediate
INF_R_642	Yes	Overexpression		FGFR3							Intermediate
INF_R_642	Yes	Single nucleotide variant		PLK1	c.A1664G	p.E555G	0.46				Borderline
INF_R_645	Yes	Amplification		MYC							Intermediate
INF_R_645	Yes	Overexpression		NTRK3							Intermediate
INF_R_645	Yes	Overexpression		GLI2							Intermediate
INF_R_645	Yes	Other	'BRCAness' positive								NA
INF_R_646	Yes	Single nucleotide variant		KRAS	c.G35T	p.G12V	0.04				Moderate
INF_R_647	Yes	Overexpression		FGFR2							Intermediate
INF_R_647	Yes	Overexpression		PDGFB							Low
INF_R_650	Yes	Other	'BRCAness' positive								NA
INF_R_654	Yes	Single nucleotide variant		KIT	c.G2446C	p.D816H	0.38				Very high
INF_R_654	Yes	Single nucleotide variant		NRAS	c.G37C	p.G13R	0.61				Very high
INF_R_655	Yes	Deletion		CDKN2A							Moderate
INF_R_655	Yes	Overexpression		CDK1							Borderline
INF_R_655	Yes	Overexpression		AURKB							Borderline
INF_R_661	Yes	InDel		SMARCB1	c.804delC	p.I268fs	0.66				Intermediate
INF_R_661	Yes	Single nucleotide variant		KDR	c.G2365A	p.V789I	0.31				Borderline
INF_R_662	Yes	Single nucleotide variant		CBL	c.1228-2A>G	NA	0.96				Moderate
INF_R_662	Yes	Overexpression		HGF							Borderline
INF_R_662	Yes	Overexpression		NOTCH2							Very low
INF_R_667	Yes	Single nucleotide variant		NTRK2	c.C2059G	p.H687D	0.08				Moderate
INF_R_667	Yes	Single nucleotide variant		PIK3CA	c.A3140G	p.H1047R	0.07				Moderate
INF_R_673	Yes	Overexpression		ERBB2							Intermediate
INF_R_673	Yes	Overexpression		AURKA							Borderline
INF_R_673	Yes	Overexpression		GUCY2C							Very low
INF_R_673	Yes	Single nucleotide variant		PLK1	c.A796G	p.N266D	0.12				Very low
INF_R_675	Yes	Other	high SNV count							n = 110	Intermediate
INF_R_675	Yes	Single nucleotide variant		ERBB4	c.G1690T	p.D564Y	0.06				Borderline
INF_R_675	Yes	Single nucleotide variant		CBL	c.A868T	p.S290C	0.42				Very low
INF_R_676	Yes	Single nucleotide variant		FGFR1	c.A1636G	p.N546D	0.22				High
INF_R_676	Yes	Single nucleotide variant		NF1	c.C2019A	p.C673X	0.7				High
INF_R_676	Yes	Amplification		MYCN							Intermediate
INF_R_681	Yes	Deletion		CDKN2A/B							Moderate
INF_R_681	Yes	Single nucleotide variant		ERBB2	c.A3655T	p.N1219Y	0.15				Borderline
INF_R_682	No
INF_R_685	Yes	Amplification		MYCN							Intermediate
INF_R_685	Yes	Other	high SNV count							n = 137	Intermediate
INF_R_685	Yes	Single nucleotide variant		FLT1	c.G919A	p.G307R	0.11				Borderline
INF_R_685	Yes	Amplification		CCND1							Low
INF_R_686	Yes	Amplification		PDGFRA							High
INF_R_686	Yes	InDel		CDKN2A	c.251_279del	p.84_93del	0.37				Moderate
INF_R_686	Yes	Other	high SNV count							n = 1074	Intermediate
INF_R_686	Yes	Overexpression		VEGFA							Borderline
INF_R_690	Yes	Overexpression		EZH2							Intermediate
INF_R_692	Yes	Overexpression		BTK							Intermediate
INF_R_692	Yes	Overexpression		PIK3CD							Intermediate
INF_R_692	Yes	Single nucleotide variant		TSC1	c.G741A	p.W247X	0.49				Intermediate
INF_R_692	Yes	Overexpression		CD79B							Low
INF_R_694	Yes	Overexpression		VEGFA							Borderline
INF_R_695	Yes	Deletion		CDKN2A/B							Intermediate
INF_R_695	Yes	Overexpression		SRC							Borderline
INF_R_696	Yes	Overexpression		ERBB2							Borderline
INF_R_696	Yes	Overexpression		KDR							Borderline
INF_R_700	No
INF_R_707	Yes	Single nucleotide variant		BRAF	c.T1799A	p.V600E	0.32				Very high
INF_R_707	Yes	Deletion		CDKN2A/B							Moderate
INF_R_707	Yes	Single nucleotide variant		PIK3CA	c.G1624A	p.E542K	0.12				Moderate
INF_R_707	Yes	Overexpression		FGF1							Low
INF_R_708	Yes	Single nucleotide variant		ALK	c.C3522A	p.F1174L	0.54				Very high
INF_R_708	Yes	Amplification		CCND1							High
INF_R_708	Yes	Amplification		MYCN							Intermediate
INF_R_708	Yes	Overexpression		KIT							Borderline
INF_R_708	Yes	Single nucleotide variant		ERBB3	c.G3018T	p.E1006D	0.33				Borderline
INF_R_709	Yes	Single nucleotide variant		FGFR1	c.C1638A	p.N546K	0.40				High
INF_R_709	Yes	Overexpression		EPHA3							Borderline
INF_R_709	Yes	Overexpression		PRKCA							Very low
INF_R_717	No
INF_R_724	Yes	Single nucleotide variant		PIK3CA	c.A3140G	p.H1047R	0.15				Moderate
INF_R_724	Yes	Other	high SNV count							n = 115	Intermediate
INF_R_724	Yes	Overexpression		KRAS							Borderline
INF_R_724	Yes	Fusion						DOK6	ALK		Borderline
INF_R_724	Yes	Overexpression		VEGFC							Low
INF_R_724	Yes	Overexpression		CCNE2							Low
INF_R_724	Yes	Other	'BRCAness' positive								NA
INF_R_734	Yes	Amplification		CDK4							High
INF_R_737	Yes	Single nucleotide variant		ALK	c.T3734G	p.F1245C	0.3				Very high
INF_R_737	Yes	Other	high SNV count							n = 104	Intermediate
INF_R_737	Yes	Amplification		MYCN							Intermediate
INF_R_738	Yes	Deletion		CDKN2A/B							Moderate
INF_R_738	Yes	Amplification		MYCN							Intermediate
INF_R_738	Yes	Single nucleotide variant		PRKCA	c.C1024A	p.L342I	0.19				Borderline
INF_R_739	Yes	Deletion		CDKN2A/B							Moderate
INF_R_739	Yes	Overexpression		DNMT3A							Intermediate
INF_R_739	Yes	Single nucleotide variant		MAP2K1	c.C601T	p.R201C	0.13				Intermediate
INF_R_739	Yes	Other	high SNV count							n = 1040	Intermediate
INF_R_739	Yes	Single nucleotide variant		RET	c.G1574A	p.R525Q	0.12				Borderline
INF_R_744	Yes	Single nucleotide variant		ERBB3	c.G2413T	p.A805S	0.08				Intermediate
INF_R_744	Yes	Single nucleotide variant		FLT3	c.G2798A	p.R933Q	0.17				Intermediate
INF_R_745	Yes	Amplification		FGFR2							Intermediate
INF_R_745	Yes	Amplification		ALK							Intermediate
INF_R_745	Yes	Amplification		MYCN							Intermediate
INF_R_749	Yes	underexpression		SMARCB1							Intermediate
INF_R_749	Yes	Overexpression		PIK3CB							Borderline
INF_R_749	Yes	Overexpression		EPHA3							Borderline
INF_R_749	Yes	Overexpression		FGF2							Low
INF_R_749	Yes	Overexpression		NRG1							Low
INF_R_749	Yes	Overexpression		IDO1							Very low
INF_R_752	Yes	Single nucleotide variant		KRAS	c.G35C	p.G12A	0.38				Very high
INF_R_752	Yes	Amplification		CCND1							Moderate
INF_R_752	Yes	Overexpression		FGFR4							Borderline
INF_R_752	Yes	Overexpression		HDAC5							Borderline
INF_R_752	Yes	Overexpression		ABL1							Borderline
INF_R_755	Yes	Single nucleotide variant		KRAS	c.G35T	p.G12V	0.58				Very high
INF_R_755	Yes	Overexpression		WEE1							Borderline
INF_R_755	Yes	Overexpression		EPHA3							Borderline
INF_R_756	Yes	Other	high SNV count							n = 9916	Intermediate
INF_R_760	No
INF_R_776	Yes	Single nucleotide variant		NRAS	c.A182G	p.Q61R	0.38				Very high
INF_R_776	Yes	Overexpression		RET							Borderline
INF_R_776	Yes	Overexpression		BCL2							Borderline
INF_R_784	Yes	Deletion		NF1							Moderate
INF_R_784	Yes	Other	'BRCAness' positive								NA
INF_R_795	Yes	Overexpression		PIK3CB							Intermediate
INF_R_795	Yes	Overexpression		PRKCQ							Intermediate
INF_R_795	Yes	Fusion						MLL	MLLT3		Intermediate
INF_R_796	Yes	Deletion		CDKN2A/B							Moderate
INF_R_796	Yes	Amplification		MYCN							Intermediate
INF_R_796	Yes	Other	high SNV count							n = 140	Intermediate
INF_R_796	Yes	Amplification		TEK							Intermediate
INF_R_799	Yes	Single nucleotide variant		SMARCB1	c.C146A	p.S49X	0.79				Intermediate
INF_R_799	Yes	Overexpression		PIK3CB							Very low
INF_R_799	Yes	Overexpression		SRC							Very low
INF_R_800	Yes	InDel		NF1	c.3845_3870del	p.1282_1290del	0.21				High
INF_R_808	Yes	Single nucleotide variant		NRAS	c.A182G	p.Q61R	0.47				High
INF_R_808	Yes	Overexpression		CD52							Borderline
INF_R_808	Yes	Overexpression		BTK							Borderline
INF_R_808	Yes	Overexpression		CCND3							Low
INF_R_818	Yes	Amplification		CDK4							High
INF_R_818	Yes	Amplification		MDM2							Moderate
INF_R_818	Yes	Other	high SNV count							n = 163	Intermediate
INF_R_818	Yes	Single nucleotide variant		ERBB3	c.A472G	p.M158V	0.08				Borderline
INF_R_820	Yes	Single nucleotide variant		ALK	c.C3522A	p.F1174L	0.43				Very high
INF_R_820	Yes	Deletion		CDKN2A							Moderate
INF_R_820	Yes	Amplification		MYCN							Intermediate
INF_R_820	Yes	Single nucleotide variant		SMARCA4	c.G1538A	p.R513Q	0.42				Intermediate
INF_R_820	Yes	Other	high SNV count							n = 167	Intermediate
INF_R_820	Yes	Single nucleotide variant		EPHA2	c.G2206A	p.V736M	0.87				Borderline
INF_R_820	Yes	Other	'BRCAness' positive								NA
INF_R_821	Yes	Overexpression		BTK							Intermediate
INF_R_826	Yes	Overexpression		RET							Borderline
INF_R_826	Yes	Single nucleotide variant		ABL1	c.A2870G	p.K957R	0.14				Borderline
INF_R_826	Yes	Overexpression		CCND1							Low
INF_R_837	Yes	Single nucleotide variant		NOTCH1	c.G4297C	p.G1433R	0.34				Borderline
INF_R_837	Yes	Overexpression		JAK3							Borderline
INF_R_837	Yes	Overexpression		PRKCQ							Very low
INF_R_845	Yes	Amplification		PDGFRA							High
INF_R_845	Yes	InDel		NTRK2	c.54_56del	p.18_19del	0.13				Borderline
INF_R_849	Yes	Deletion		CDKN2A							Moderate
INF_R_849	Yes	Other	high SNV count							n = 117	Intermediate
INF_R_849	Yes	Overexpression		NRG2							Low
INF_R_849	Yes	Overexpression		HGF							Low
INF_R_850	No
INF_R_853	Yes	Single nucleotide variant		CDKN2C	c.C259T	p.Q87X	0.44				Moderate
INF_R_854	No
INF_R_857	Yes	Amplification		PDGFRA							Moderate
INF_R_857	Yes	Other	'BRCAness' positive								NA
INF_R_869	Yes	Amplification		CCNE1							Moderate
INF_R_869	Yes	Other	high SNV count							n = 126	Intermediate
INF_R_869	Yes	Single nucleotide variant		KDR	c.G2210T	p.C737F	0.28				Borderline
INF_R_869	Yes	Amplification		IGF1R							Borderline
INF_R_869	Yes	Overexpression		EPHA2							Borderline
INF_R_869	Yes	Other	'BRCAness' positive								NA
INF_R_871	Yes	Amplification		MYCN							Intermediate
INF_R_871	Yes	Other	'BRCAness' positive								NA
INF_R_874	Yes	Overexpression		AKT3							Borderline
INF_R_874	Yes	Overexpression		HRAS							Borderline
INF_R_874	Yes	Overexpression		CCNE2							Borderline
INF_R_876	Yes	Amplification		CDK4							High
INF_R_876	Yes	Amplification		VEGFA							Borderline
INF_R_876	Yes	Amplification		MYCN							Very low
INF_R_880	Yes	Single nucleotide variant		NRAS	c.A182G	p.Q61R	0.86				Very high
INF_R_880	Yes	Amplification		CDK6							High
INF_R_880	Yes	Amplification		CCNE2							Intermediate
INF_R_880	Yes	Overexpression		MAP2K1							Borderline
INF_R_880	Yes	Single nucleotide variant		PRKCB	c.G1636A	p.E546K	0.09				Borderline
INF_R_880	Yes	Single nucleotide variant		FGF3	c.C650T	p.P217L	0.28				Low
INF_R_887	Yes	Overexpression		BCL2							Borderline
INF_R_887	Yes	Overexpression		PRKCD							Borderline
INF_R_888	Yes	Single nucleotide variant		NRAS	c.G37T	p.G13C	0.30				Very high
INF_R_888	Yes	Deletion		CDKN2A/B							Moderate
INF_R_888	Yes	InDel		PTEN	c.736_737insCCAT	p.P246fs	0.53				Moderate
INF_R_888	Yes	Overexpression		CD38							Borderline
INF_R_888	Yes	Overexpression		CDK6							Borderline
INF_R_909	Yes	Deletion		SMARCB1							Intermediate
INF_R_909	Yes	Overexpression		EPHA4							Borderline
INF_R_913	Yes	Single nucleotide variant		PTPN11	c.A227C	p.E76A	0.41				Moderate
INF_R_913	Yes	Single nucleotide variant		PRKCQ	c.A1604C	p.K535T	0.1				Intermediate
INF_R_913	Yes	Overexpression		JAK2							Borderline
INF_R_913	Yes	Overexpression		CBL							Low
INF_R_949	Yes	Single nucleotide variant		NF1	c.T4457A	p.L1486X	0.42				High
INF_R_958	No
INF_R_959	Yes	Deletion		SMARCB1							Intermediate
INF_R_959	Yes	Overexpression		FGF2							Borderline
INF_R_959	Yes	Overexpression		ERBB4							Borderline
INF_R_959	Yes	Overexpression		CD274							Low
INF_R_959	Yes	Overexpression		MST1R							Low
INF_R_966	Yes	Amplification		CDK4							High
INF_R_966	Yes	Overexpression		TGFB3							Very low
INF_R_973	No
INF_R_978	Yes	Amplification		MYCN							Intermediate
INF_R_986	Yes	Single nucleotide variant		PTEN	c.C388G	p.R130G	0.77				Moderate
