# Supplementary material for: The Pediatric Precision Oncology INFORM Registry: Clinical Outcome and Benefit for Patients with Very High-Evidence Targets
Source: Oxford University Press journal article supplement (doi:10.1158/2159-8290.cd-21-0094), 2021-08-09
Supplement: cd-21-0094_table_s6_suppst6.xlsx [file cd-21-0094_table_s6_suppst6.xlsx]

## Sheet: Table S6
	Supplementary Table S6. PFS and OS (95% CI) of individual diseases.
	Diagnosis	n PFS	Median PFS (days)	95%-CI PFS (days)	n OS	Median OS (days)	95%-CI OS (days)
	Hematological malignancies
	Acute lymphoblastic leukemia	14	362	235 - NA	14	530	352 - NA
	Acute myeloid leukemia	6	111	66 - NA	6	266.5	91 - NA
	Non-Hodgkin lymphoma	4	93	28 - NA	4	94	30 - NA
	Other	1	367	NA - NA	1	368	NA - NA
	Solid tumors
	Desmoplastic small round cell tumor	6	223.5	162 - NA	6	426.5	331 - NA
	Ewing sarcoma	46	187	120 - 337	47	443	372 - 715
	Malignant rhabdoid tumor	3	116	19 - NA	3	117	81 - NA
	Neuroblastoma	49	198.5	141 - 335	49	459	325 - 698
	Osteosarcoma	27	112	92 - 182	27	290	210 - 763
	Rhabdomyosarcoma	37	128	91 - 264	38	325	198 - 566
	Other soft tissue sarcoma	32	198	114 - 510	32	656	429 - NA
	Other	25	85	77 - 258	25	265	173 - NA
	CNS tumors
	Atypical teratoid rhabdoid tumor	8	105	69 - NA	8	270	181 - NA
	Ependymoma	23	109	89 - 530	23	586	347 - NA
	High grade glioma (incl. DIPG)	47	194	151 - 278	47	366	280 - 554
	Medulloblastoma	16	203.5	92 - 406	16	468.5	293 - NA
	Other	9	181	101 - NA	9	291	224 - NA
	Total	353	167	135-194	355	405	361-464
	Note: Only patients registered before 01-OCT-2017 are included here. The patients registered after 01-OCT-2017 who were lost to follow-up or deceased are not included here to reflect a representative PFS and OS for the respective populations. See also Fig. 1.
