# Supplementary material for: The Pediatric Precision Oncology INFORM Registry: Clinical Outcome and Benefit for Patients with Very High-Evidence Targets
Source: Oxford University Press journal article supplement (doi:10.1158/2159-8290.cd-21-0094), 2021-08-09
Supplement: cd-21-0094_table_s7_suppst7.xlsx [file cd-21-0094_table_s7_suppst7.xlsx]

## Sheet: Table 7a
	Supplementary Table S7a. Constitutional cancer predisposing variants (pathogenic/likely pathogenic)
	ID	Diagnosis	Gene	Chromosome	Position	Reference base(s)	Alternate base(s)	Variant c.	Variant p.	Transcript	ACMG Class	AF control	2nd hit	Previously known?
	INF_R_001	Malignant peripheral nerve sheath tumor	NF1	17	29509514	T	G	c.731-12T>G	p.?	NM_000267.3	class 4	het	LOH (del)	Yes
	INF_R_021	Adenocarcinoma	MSH6	2	48032092	CTGCTGAAGTGTGCAGGCTCACACCAATT	.	c.3482_3510del	p.(Pro1161Argfs*2)	NM_000179.3	class 4	hom	n/a	Yes
	INF_R_025	High grade glioma	BRCA2	13	32903605	TGT	T	c.658_659del	p.(Val220Ilefs*4)	NM_000059.3	class 5	comp het	n/a	Yes
			BRCA2	13	32914460	GA	G	c.5969delA	p.(Asp1990Valfs*14)	NM_000059.3	class 5	comp het	n/a	Yes
	INF_R_039	Neuroblastoma	ALK	2	29432664	C	T	c.3824G>A	p.(Arg1275Gln)	NM_004304.4	class 5	het	n/a (duplication of activated allele)	No
	INF_R_041	Acute myeloblastic leukemia	n/a	11p Uniparental disomy (mosaic)				n/a	n/a	n/a	n/a	n/a	n/a	Yes
	INF_R_050	Osteosarcoma	TP53	17	7560000-7575000			15kb deletion	n/a	n/a	n/a	het	No 2nd hit	Yes
	INF_R_079	Malignant peripheral nerve sheath tumor	NF1	17	29528489	C	T	c.1246C>T	p.(Arg416*)	NM_000267.3	class 5	het	Somatic mutation (c.6670C>T p.(Gln2224*))	Yes
	INF_R_083	Paraganglioma	SDHB	1	17345441	C	A	c.778G>T	p.(Gly260Trp)	NM_003000.3	class 4	het	LOH (del)	Yes
	INF_R_1003	Rhabdoid tumor	SMARCA4	19	11113836	G	T	c.1943+1G>T	p.?	NM_003072.3	class 5	het	Somatic mutation (c.4609C>T p.(Gln1537*))	u/k
	INF_R_1007	Rhabdomyosarcoma (alveolar)	BRCA2	17	32910922	CA	C	c.2435delA	p.(Asn812Ilefs*13)	NM_000059.3	class 5	het	No 2nd hit	No
	INF_R_1076	Medulloblastoma	BRCA2	13	32907387	TTTAT	T	c.1773_1776del	p.(Ile591Metfs*22)	NM_000059.3	class 5	hom	n/a	Yes
	INF_R_113	Ewing sarcoma	CHEK2	22	29121326	T	C	c.349A>G	p.(Arg117Gly)	NM_007194.4	class 4	het	No 2nd hit	No
	INF_R_130	Osteosarcoma	TP53	17	7574002	C	G	c.1025G>C	p.(Arg342Pro)	NM_000546.4	class 4	het	LOH (del)	Yes
	INF_R_160	Osteosarcoma	PALB2	16	23647169	AC	A	c.697delG	p.(Val233Leufs*5)	NM_024675.3	class 5	het	No 2nd hit	u/k
	INF_R_165	Atypical teratoid rhabdoid tumor	SMARCB1	22	24134006	C	T	c.157C>T	p.(Arg53*)	NM_003073.4	class 4	het	LOH (del)	No
	INF_R_177	Osteosarcoma	TP53	17	7578269	G	A	c.580C>T	p.(Leu194Phe)	NM_000546.5	class 4	het	LOH (del)	No
	INF_R_178	Primitive neuroectodermal tumor	DICER1	14	95566254	A	AA	c.4069dupT	p.(Tyr1357Leufs*19)	NM_177438.2	class 5	het	Somatic mutation (c.3675C>A p.(Tyr1225*))	No
	INF_R_238	Yolk sac tumor	CHEK2	22	29121049	CA	C	c.507delT	p.(Phe169Leufs*2)	NM_007194.3	class 4	het	LOH (copy-number neutral)	No
	INF_R_258	Atypical teratoid rhabdoid tumor	SMARCB1	22:22000000-24000000 deletion (heterozygous)				n/a	n/a	n/a	n/a	n/a	Somatic mutation (c.118C>T p.(Arg40*))	Yes
	INF_R_265	Undifferentiated pleomorphic sarcoma	TP53	17	7578406	C	T	c.524G>A	p.(Arg175His)	NM_000546.4	class 5	het	LOH (copy-number neutral)	No
	INF_R_273	High grade glioma	TP53	17	7574002	C	G	c.1025G>C	p.(Arg342Pro)	NM_000546.5	class 4	het	LOH (copy-number neutral)	No
	INF_R_275	High grade glioma	ATM	11	108153571	TTTATT	T	c.3712_3716del	p.(Leu1238Lysfs*6)	NM_000051.3	class 4	het	LOH (del)	No
	INF_R_277	Neuroblastoma	n/a	16p11.2 microdeletion				n/a	n/a	n/a	n/a	n/a	n/a	Yes
	INF_R_305	High grade glioma	PMS2	7	6026709	G	A	c.1687C>T	p.(Arg563*)	NM_000535.6	class 5	hom	n/a	No
	INF_R_353	Undifferentiated sarcoma of the liver	SDHB	1	17350523	C	T	c.587G>A	p.(Cys196Tyr)	NM_003000.2	class 5	het	LOH (del)	No
	INF_R_387	Osteosarcoma	RB1	13	49047494	AGA	A	c.2490-1_2490del	p.?	NM_000321.2	class 5	het	LOH (del)	Yes
	INF_R_400	Neuroblastoma	CDKN1B	12	12870979	C	T	c.206C>T	p.(Pro69Leu)	NM_004064.4	class 5	het	No 2nd hit	No
	INF_R_401	Medulloblastoma	TP53	17	7577548	C	T	c.733G>A	p.(Gly245Ser)	NM_000546.5	class 5	het	LOH (del)	Yes
	INF_R_427	Cribriform neuroepithelial tumor	SMARCB1	22	24143246	AA	A	c.479delA	p.(Lys160Argfs*16 )	NM_003073.4	class 4	het	LOH (del)	Yes
	INF_R_435	Osteosarcoma	CHEK2	22	29091856	AG	A	c.1100delC	p.(Thr367Metfs*15)	NM_007194.3	class 5	het	No 2nd hit	No
	INF_R_450	Neuroblastoma	LZTR1	22	21350387	G	TC	c.2205delinsTC	p.(Glu737Argfs*45)	NM_006767.3	class 4	het	Somatic mutation (c.644G>T p.(Trp215Leu))	No
	INF_R_473	Osteosarcoma	TP53	17	7577548	C	T	c.733G>A	p.(Gly245Ser)	NM_000546.5	class 5	het	LOH (del)	Yes
	INF_R_503	Neuroblastoma	ALK	2	29432664	C	T	c.3824G>A	p.(Arg1275Gln)	NM_004304.4	class 5	het	n/a	No
	INF_R_574	Diffuse intrinsic pontine glioma	BRCA1	17	41209080	G	GG	c.5266dupC	p.(Gln1756Profs*74)	NM_007294.3	class 5	het	No 2nd hit	No
	INF_R_686	High grade glioma	MSH6	2	48025812	AG	A	c.691delG	p.(Val231Tyrfs*15)	NM_000179.3	class 5	hom	n/a	Yes
	INF_R_692	Acute lymphoblastic leukemia	SLX4	16	3658866	G	A	c.100C>T	p.(Gln34*)	NM_032444.2	class 4	het	No 2nd hit	No
	INF_R_756	High grade glioma	PMS2	7	6017220	G	A	c.2444C>T	p.(Ser815Leu)	NM_000535.6	class 4	hom	n/a	Yes
	INF_R_408	Neuroblastoma	PALB2	6	23647356	TAG	T	c.509_510del	p.(Arg170Ilefs*14)	NM_024675.3	class 5	het	No 2nd hit	No
	INF_R_949	Acute myeloblastic leukemia	SDHA	5	223624	C	T	c.91C>T	p.(Arg31*)	NM_004168.4	class 5	het	No 2nd hit	No
	Abbreviations: AF: allele frequency; comp het: compound heterozygous; het: heterozygous; hom: homozygous; LOH: loss of heterozygosity; LOH (del): loss of heterozygosity with deletion of normal allele; n/a: not applicable; u/k: unknown

## Sheet: Table 7b
	Supplementary Table S7b. List of known CPS genes.
	CPS genes
	ABCB11
	ALK
	APC
	ATM
	AXIN2
	BAP1
	BLM
	BMPR1A
	BRAF
	BRCA1
	BRCA2 (FANCD1)
	BRIP1 (FANCJ)
	BUB1B
	CBL
	CBP
	CDC73
	CDH1
	CDK4
	CDKN1B
	CDKN1C
	CDKN2A
	CEBPA
	CHEK2
	COL7A1
	CREBBP
	CYLD
	DDB2
	DHCR7
	DICER1
	DIS3L2
	DKC1
	DOCK8
	EGFR
	ELANE
	EP300
	EPCAM
	ERCC1
	ERCC2
	ERCC3
	ERCC4 (FANCQ)
	ERCC5
	EXT1
	EXT2
	FAH
	FANCA
	FANCC
	FANCD2
	FANCE
	FANCF
	FANCG
	FANCI
	FANCL
	FANCM
	FGFR2
	FGFR3
	FH
	FLCN
	FMR1
	GATA2
	GBA
	GJB2
	GLI3
	GNAS
	GPC3
	H19
	HFE
	HMBS
	HRAS
	ITK
	KCNQ1OT1
	KIT
	KRAS
	L2HGDH
	LZTR1
	MAP2K1
	MAP2K2
	MAX
	MEN1
	MET
	MITF
	MLH1
	MRE11 (MRE11A)
	MSH2
	MSH6
	MTAP
	MUTYH
	NBN
	NF1
	NF2
	NFIX1
	NHP2
	NOP10
	NRAS
	NSD1
	NTRK1
	PALB2 (FANCN)
	PAX5
	PDGFRA
	PHOX2B
	PMS2
	POLD1
	POLE
	POLH
	PRKAR1A
	PRSS1
	PTCH1
	PTEN
	PTPN11
	RAD50
	RAD51C (FANCO)
	RAD51D
	RAF1
	RB1
	RECQL4
	RET
	RHBDF2
	RMRP
	RUNX1
	SBDS
	SDHA
	SDHAF2
	SDHB
	SDHC
	SDHD
	SERPINA1
	SETBP1
	SH2B3
	SH2D1A
	SHOC2
	SLC25A13
	SLX4 (FANCP)
	SMAD4
	SMARCA2
	SMARCA4
	SMARCB1
	SMARCE1
	SOS1
	SRY
	STAT3
	STK11
	SUFU
	TERT
	TFAP2A
	TGFBR1
	TMEM127
	TP53
	TRIM37
	TSC1
	TSC2
	UROD
	VHL
	WAS
	WRN
	WT1
	XPA
	XPC
	XRCC3
